# Supplementary material for: How to identify design optimization problems that can be improved with a control co-design approach ?
Source: Copernicus journal article supplement (doi:10.5194/wes-2023-58), 2023-06-16
Supplement: Supplementary file [file wes-2023-58-AC1-supplement.pdf]

## Reply to Reviewers

We thank the reviewers for their detailed analysis and constructive input. A list of point-by-point replies to the reviewers' comments is detailed in the following.

Additionally, we have taken the opportunity of this revision to make several small editorial changes to the text, in order to improve readability.

A revised version of the manuscript is attached to the present reply, with the main changes highlighted in red (deletions) and blue (additions).

Best regards.  
The authors

### Reviewer 1

#### **Overall Thoughts**

*Overall, this manuscript has a clear objective and application. The authors propose a method to estimate the impact of changes in control design variable on the objective function in an optimization study without directly solving a control co-design (CCD) optimization problem. The authors argue that this method would save the user time in identifying a scenario where the objective function is insensitive to the control design variable—making CCD somewhat trivial—without actually going through the effort of solving the more complex problem. This intention to reduce computational time in the design process is well-motivated, but I believe the discussion of this point could be more comprehensive.*

*A second thread of the manuscript is the application of the proposed method to the optimal design of a wind turbine tower with fatigue load constraints. I believe the details of this case study convolute and overshadow the main objective at times, and a more refined description is necessary.*

*After addressing these comments and some other minor revisions, I believe this manuscript will be suitable for publication in Wind Energy Science.*

#### **Major Comments**

- *Line 171: What is the surrogate model for LCOE and how was it calibrated? The model form of the objective function and its dependence on the design variables is necessary information for the reader to understand the case study.*

**Authors:** We agree with this remark. In the revised manuscript, the objective function is reported in Section 3.3 and the estimate for the cost of energy is described more precisely in Section 4. While revising the manuscript, we found an inconsistency in the text: the objective function was reported as the Levelized Cost of Energy (LCOE), whereas it was in fact the Cost of Energy (CoE). This error does not impact the results or conclusion of the study.

- *Line 189: "A gain schedule is created by varying the parameters  $r$  and  $q$  over the operational range." I don't think this phrase is intuitive for a reader unfamiliar with LQR control. Also, a few lines later: "The weight matrix entry associated to the tower top velocity was found to give a good*

*fatigue damage reduction, without affecting the standard deviation of the power production in a significant manner.” This description is vague and not reproducible. Similar to the previous comment, the details of the case study (LQR control law, LCOE minimization, etc.) are extensive compared to the objective function sensitivity estimator. I think they require more explanation to be comprehensible by the reader or should be removed or moved to an appendix.*

**Authors:** The values of the parameters  $r$  and  $q$  have been added to Equation (13) in order to ensure reproducibility of the results. The paragraph related to the choice of parametrization has been removed.

- *Line 261: I think the comparison of computational cost between the proposed estimator and the full CCD solution could be clearer. The authors state that “12 [shouldn’t this be 16?] evaluations of the full set of aeroelastic simulations for each configuration” were run for the estimator, while the CCD problem requires “running the full set of simulations 50 times for the soft-soft configuration and 20 times for the standard configuration.” I’m not sure why these specific numbers of simulations were chosen. Furthermore, how could this result generalize outside of the tower design case study?*

**Authors:** A section describing the computational effort has been added (Section 5.3) with more details. We have chosen to use the number of evaluations of the full set of aeroelastic simulations as the main metric for the computational effort since it is the most computationally expensive step in the analysis. In addition, the wall time for the entire process depends heavily on the hardware (HPC or workstation) or the aero-elastic solver used. Nonetheless, we report the wall time normalized by the CCD value as a secondary metric.

The number of full set evaluations for the estimator is now explained in the text:

*(l. 292-296) “The fatigue damage constraints are evaluated for four different values of the control tuning, and require one full-set evaluation each. The Lagrange multipliers are evaluated for four different tower heights, and require between one and two full-set evaluations each, depending on the number of iterations in the frozen-load loop. As a result, the estimator is calculated using a total of 11 or 12 full-set evaluations depending on the configuration.”*

We expect similar computational effort benefits for comparable structural optimization problems, where the fatigue damage constraint is driving. Instead, if the driving constraint is easier to calculate, the computational cost for the estimation method will likely drop. The discussion section has been updated to reflect this aspect:

*(l. 312-316) “The method is applicable to similar problems where the optimum design is driven by a load constraint, when loads can be alleviated by control action (for example, the design of wind turbine support structures or blades). The computational cost reduction should be similar in problems where the fatigue damage constraints are driving the design. In cases where the driving constraints are easier to evaluate, there should be a greater reduction in computational effort, since the estimator would be less expensive to compute.”*

### **Minor Comments**

- *Title: I find the question format of the title to be a bit strange and not descriptive of the particular methods introduced by the paper. Perhaps something in the vein of: “Identifying design*

*optimization problems for control co-design approach with objective function sensitivity estimator”?*

**Authors:** We agree that the title should be more descriptive, and have updated it following this comment and a related comment from Reviewer 2: *“A sensitivity-based estimation method for investigating control co-design relevance”*

- *Line 95: How valid is the simplification to only consider active constraints, and assuming that the active set of constraints does not change with control tuning? If your constraint is a function of control tuning, it seems plausible that a change in control could cause an inactive constraint to become active.*

**Authors:** The assumption that the active set does not change is important for the precision of the estimator. This formula cannot capture the effects of an inactive constraint becoming active with a change of control. We address this aspect in the discussion

*(l. 319-323) “The precision of the high-order estimator depends on several assumptions on the objective functions and constraints. When the assumptions are violated, the estimator can under-predict the benefits of CCD, as shown in our results. In addition, the estimator uses local sensitivity information of the non-CCD optimum, and therefore it will be inaccurate when a CCD approach significantly changes the design. Consequently, there may still be a benefit of using a CCD approach, even if the estimator fails to show it.”*

- *Line 114: There is repeated use of the phrase “diminishing returns” of controller tuning without any elaboration on what the authors mean. I understand that in Figure 5, a marginal increase in control tuning leads to a diminishing change in optimal tower mass. I think this point could be clearly defined earlier in the manuscript if this phrase is to be used.*

**Authors:** By “diminishing returns”, we mean a non-linear impact of the control tuning on the constraints and objective function. This point has been clarified: *(l. 113-114) “A purely linear estimator only takes into account the linear variation of the problem with dc and cannot capture non-linear effects such as diminishing returns.”*

- *Line 133: Is resonance avoidance not included in the soft-soft configuration in order to simplify the problem and focus on the objective function sensitivity? This is a valid approach, but I think the authors should state that point clearly. Otherwise, the problem definition for the soft-soft case seems impractical.*

**Authors:** We agree with this comment. The following sentence has been added in the paragraph describing the optimization problem: *(l. 141-144) “In this work, the controller design of the soft-soft configuration is kept simple in order to focus on the objective function sensitivity. We assume that the controller is designed in such a way as to operate immediately below and above the resonant frequency, using a classical frequency skipping approach (Bossanyi, 2000). However, for simplicity, we did not implement this feature in the controller, and we simply avoided running simulations in proximity of the resonant condition.”*

- *Line 147: “On the other hand, the AEP used to calculate the LCOE is only marginally impacted by the control tuning, since it is based on the average power production, which tends to be relatively*

*insensitive to such changes.” Is there a source to justify this statement?*

**Authors:** The annual energy production is calculated from the average power production. Instead, the goal of the controller tuning is to maintain the power production at its desired level despite perturbations or turbulence. So, the AEP should be relatively insensitive to the controller tuning, provided that an adequate controller is chosen. Nonetheless, the sentence has been updated for clarification: (l. 222-223) “*However, the net annual energy production is mostly driven by the tower height, whereas the impact of the controller tuning and the inner tower design is marginal in comparison*”

- *Line 149: I have trouble following the process for solving the optimization problems. For a given tower height, the loads on the tower are simulated and used to optimize the tower mass. When is the height of the tower changed and LCOE minimized? It seems like the solution of the outer optimization problem has not been described. Also, it is stated that “If the change in [tower mass] design is greater than a given threshold, the process is repeated iteratively (Bottasso et al., 2016).” What threshold is used in this paper?*

**Authors:** It is outside the scope of this paper to describe the details of the optimization framework Cp-max. This framework is documented in several research papers. The threshold used for the frozen-load loop is 1% on the change of tower mass, as now noted in the revised manuscript.

- *Line 203: I think more details on the aeroelastic simulations could be given. What certification standards were used for fatigue analysis? How is turbulence synthetically generated and modeled? How long is the transient period?*

**Authors:** We provide in the manuscript a reference to Bottasso et al. (2016) where information on the aero-elastic simulations can be found. In addition, we have added a reference to the IEC 64200 standard in the text. The transient period is 30 seconds, and the turbulence is generated using TurbSim (Jonkman and Kilcher, 2012). The text has been updated accordingly.

- *Line 203: How is the fatigue damage resulting from different wind speeds combined into a single estimate of lifetime fatigue damage? Is there a probability distribution of wind speeds that inform taking a weighted average of the different fatigue values?*

**Authors:** It is outside the scope of this paper to describe in detail the fatigue damage calculation. We provide at the beginning of Section 3.3 a reference to Bottasso et al. (2012) where the details of the structural model can be found.

- *Figure 4: Panel ‘b’ contains the Lagrange multipliers for geometric constraints, and ‘c’ for the fatigue damage. The caption appears to have the wrong labels.*

**Authors:** The caption has been corrected.

- *Table 1: The caption could be simpler and less confusing. The reference for the table is the optimization solution without CCD for a control input of zero. Then, LCOE is optimized with CCD*

and with the estimator method and compared relative to that reference value. There are a few points in the manuscript where the change of optimal LCOE is presented without a clear definition of what the reference value is.

**Authors:** Thank you for raising this issue. The header of Table 1 has been modified to remove “CCD”, and the caption has been modified as follows:

*“Table 1: Percentage improvement on the optimal CoE using a CCD approach, calculated with optimization results and the estimation method”.*

We want to clarify that Table 2 is included in order to document the optimization results used to produce the data in Table 1. The text introducing this table has been adjusted for this purpose in the updated manuscript.

- *Line 269: The authors state that the estimator accurately predicts the optimal objective value, but not the optimal design. I think it could be useful to clarify here that the goal of this method is to identify how much the objective function can be improved by control tuning, and in cases where the estimator signals much potential, a full CCD study would be performed. Otherwise, the reader could jump to the conclusion that the proposed method would not ultimately reach an optimal design.*

**Authors:** We agree with this comment. The sentence referred to by Reviewer 1 has been updated as follows:

*(l. 279-281) “We note that the estimated change in optimal design is far from the actual one in Fig.5. This is coherent with the goal of the presented method to quantify the sensitivity of the optimal objective value and not of the optimum.”*

- *Line 284: Would there be any advantage to quantifying uncertainty of the estimator? In other words, high uncertainty in the estimator could encourage a user to explore the CCD problem regardless of the compared sensitivity in the objective function.*

**Authors:** There would certainly be an advantage to studying the uncertainty associated with the proposed method. Such work would require the study of uncertainty quantification applied to design sensitivity analysis and could be the topic of future work. However, the relevance of such a study could be limited since CCD optimization is not a widely used approach.

### **Typographical Comments**

- *Equation 10: Could be split up into two separately numbered equations, one for the “outer” optimization problem and one for the “inner” problem.*

**Authors:** We have considered splitting Equation 10 as you suggested, but have opted to keep it as is for conciseness.

### **Reviewer 2**

*The paper considers control co-design (CCD) for wind energy systems, with as specific case study, the design of soft-stiff and soft-soft wind turbine towers. Such integrated design of the system and its controller is*

typically computationally demanding, due to the computational cost of an analysis for each controller design. Specifically for tower design, load calculations determine this cost.

The paper presents a methodology to create a simplified version of the CCD optimization problem that is less computationally demanding, but still can provide information about the interaction between system and control design. The idea is that first solving the simplified optimization problem, its results can make it clear whether or not it is worth it to solve the CCD optimization problem.

The paper proposes approximations ('estimators') for the CCD problem. They are based on decoupling the design of the system and the controller, assuming the latter fixed. So for a fixed controller design, an optimal system design  $x^*$  is obtained. The CCD problem is then approximated by doing first-order and second-order approximations of the neighborhood of  $x^*$  as a function of controller parameters.

When applied to the tower design case studies, it is seen that the first-order gives some, but arguably too limited information about the usefulness of doing CCD. The second-order approximation does give sufficient information. The results are that the effort of doing CCD is worth it for soft-soft towers, but not for soft-stiff towers.

### **General comments**

The paper discusses a topic of widespread interest in the wind energy systems design community: approaches to reduce the computational burden of design optimization. Any advances in this area are scientifically relevant. The paper discusses existing literature touching on CCD-type approaches to show specific interest in this area.

The approximations proposed as part of the methodology are theoretically nontrivial. They require careful derivation of gradients and higher-order derivatives, adding assumptions to simplify expressions obtained. A good part of the paper is dedicated to this, including two appendices, one of which contains a very commendable and informative analysis of how their approximations can break. The notation is generally good, but would need to be introduced more carefully in advance, to avoid readers having to deal with too much while trying to understand the derivations. Furthermore, the assumptions made at different locations in the paper should be made more explicit, to make sure readers have a clear view of the approximation's limitations.

These theoretical discussions are performed on an abstract formulation of the CCD optimization problem. The case study's concrete optimization problems are not directly formulated as such. There is also not a clear translation of this concrete problem to the abstract one, to the detriment of the reader's understanding. What complicates matters is that the simplification performed is not limited to just the approximations introduced, but also involves a surrogate model for one aspect of the concrete optimization problem. With the current presentation, it cannot be expected that readers can understand how the concrete and abstract problems are related with reasonable effort.

The goal of the methodology is, effectively, to substantially reduce the computational cost associated to the optimization of a wind energy system. Therefore, it is as important to get a good quantitative view of computational cost (or time, given fixed computational resources) next to the accuracy of the approximations. In the paper, the accuracy is sufficiently described, but the computational cost is not. It is dealt with in one paragraph, which is unclear and in one possible way of reading it may even imply that there is not much difference between solving the simplified problem and the full CCD problem. (In terms of

costly load calculations: 50 vs. 16 for soft-soft and 20 vs. 16 for soft-stiff.) Were this reading to be correct, this would severely undermine the significance of this paper.

- **Authors:** In order to highlight the benefits in terms of computational effort, a dedicated section has been added (Section 5.3). We have included a table comparing the number of costly load evaluations, the number of iterations of the outer-optimization, as well as the wall time relative to the CCD optimization. In the case of the standard tower configuration, the number of full set evaluations is 20 for the CCD optimization and 11 for the estimator. In this case, the difference in computational effort is small. This is likely because the initial design is very close to the optimal design, and the optimization algorithm requires only 4 iterations to converge. We have added the following sentence at the end of Section 5.3 to clarify this point:

*(l. 298-301) “We note that the number of iterations for the outer optimization for the two CCD cases is low. For more complex problems or using a tighter optimization tolerance, the number of iterations is likely to increase significantly, and the computational effort of the CCD process will also increase.”*

Furthermore, we would like to highlight that the estimation method allows us to understand the reason why a CCD approach would be beneficial or not. In the submitted manuscript, this point was not clear, so we have added the following sentence in the discussion section (Section 6):

*(l. 308-311) “Furthermore, the analysis of the Lagrange multipliers and constraint sensitivity in the proposed method gives a justification for why a CCD approach would fail. This information is generally not readily available when running a CCD optimization directly, because optimization algorithms can fail for technical reasons (inadequate parameters, scaling or problem formulation).”*

### **Overview of specific aspects**

*My judgments here are based on my current understanding of the work.*

*Does the paper address relevant scientific questions within the scope of WES?*

*Yes. Reducing computational cost of wind energy system design optimization.*

*Does the paper present novel concepts, ideas, tools, or data?*

*Yes. The specifics of the methodology proposed, i.e., the approximations, are new in this context.*

*Is the paper of broad international interest?*

*Yes. All wind energy system designers could benefit from significant advances in this area.*

*Are clear objectives and/or hypotheses put forward?*

*Yes. The reduction of computational cost of wind energy system design.*

*Are the scientific methods valid and clear outlined to be reproduced?*

*Partial. The general overview of the methodology and its application to the case study are clear, but its details are not.*

*Are analyses and assumptions valid?*

*Yes. The analysis is set up well and much care is taken to discuss the assumptions made and their limitations.*

*Are the presented results sufficient to support the interpretations and associated discussion?*

*Partial. The analysis of accuracy of the approximations seems quite solid, but the analysis of computational cost is insufficient.*

*Is the discussion relevant and backed up?*

*Mostly. The discussion is mostly conceptual, but includes at least one statement that would require further explanation (“We can expect ... reduced benefits.”).*

*Are accurate conclusions reached based on the presented results and discussion?*

*Partial. Statements about computational cost are insufficiently backed by presented results.*

*Do the authors give proper credit to related and relevant work and clearly indicate their own original contribution?*

*Yes. They seem to do a good job of mentioning related relevant literature.*

*Does the title clearly reflect the contents of the paper and is it informative?*

*Partial. It mentions CCD and design optimization, but not anything about the nature of the approximations or the concrete case study. (It is my opinion that a more informative title would be desirable. For example: “A second order approximation for investigating control co-design relevance applied to wind turbine tower design”)*

*Does the abstract provide a concise and complete summary, including quantitative results?*

*Yes. Computational cost discussion may need to be amended.*

*Is the overall presentation well structured?*

*Partial. See specific comments.*

*Is the paper written concisely and to the point?*

*Partial. See specific comments.*

*Is the language fluent, precise, and grammatically correct?*

*Mostly. Any remaining issues can be easily fixed by the journal's copy-editors.*

*Are the figures and tables useful and all necessary?*

*Yes. More could/should be added; see specific comments. (N.B.: Figure 1 deserves explicit praise.)*

*Are mathematical formulae, symbols, abbreviations, and units correctly defined and used according to the author guidelines?*

*Mostly. Some may need to be introduced earlier/better; see technical corrections.*

*Should any parts of the paper (text, formulae, figures, tables) be clarified, reduced, combined, or eliminated?*



Yes. See general comments above and specific comments.

Are the number and quality of references appropriate?

Yes.

Is the amount and quality of supplementary material appropriate and of added value?

Yes. The appendices with details about the approximations are actually necessary if no external reference makes their content easily accessible.

**Authors:** Thank you for this evaluation of the manuscript. We have addressed these aspects in the specific comments and technical corrections below. In addition, the title has been adjusted following this comment and Reviewer 1's comment: "*A sensitivity-based estimation method for investigating control co-design relevance*"

### **Specific comments**

- *Paper presentation, focus, and clarity.*

*As mentioned, the paper's current structure can cause confusion with the reader when trying to understand how the concrete optimization problems (10-12) are reduced to the abstract one (1|2). Namely, in Sec. 3.1, 3.3, 3.4 the case study problem is described. In Sec. 3.2, the reduction to the abstract problem is attempted. I think it can be clearer when Sec. 3 only focuses on presenting the concrete optimization problem and then a new section after that focuses on the reduction of the concrete problem to the abstract version. This new section should be far more elaborate than the current Sec. 3.2 and really explicitly make the correspondence between the  $f$  and  $g$  of the abstract problem and the constraints and objective of the concrete problem, making sure that it is clear how the two-layered optimization structure of the concrete problem is gotten rid of.*

*(You could even consider moving the concrete problem first and the abstract problem second, but that is a matter of taste.)*

**Authors:** Thank you for raising this issue. We agree with this comment. In order to clarify how the concrete problem relates to the abstract one, we have followed the recommendation in this comment and have added a section describing how the estimation formula is applied to the tower problem (Section 4). In addition, the description of the surrogate function for the CoE is described in more detail.

- *Figures and tables*

*Figure 6 is very illuminating. It would be good to add such a figure as well for the first-order approximation, so that the difference between the two approximations becomes clearer. Furthermore, the full CCD problem will have given rise to a decent number of LCOE-evaluations and would allow to also visualize the actual underlying LCOE-surface for both tower types. It would be of great value if this were done, as it would give a feeling how far or close the approximations (+surrogate) are from the 'ground truth'.*

**Authors:** We agree with this comment. We have updated Figure 6 to include the first-order estimate function and corresponding estimated optimum. In addition, Table 2 is updated to include the results for the first-order estimation.

Regarding the validity of the CoE estimate functions, the two CCD optimizations evaluate the CoE 12 and 25 times for the standard and soft-soft configurations, respectively. The value of the tower height and control tuning for these iterations is highlighted in Figure S1 below. However, it would be difficult to construct an accurate CoE surface from these point distributions. Instead, we compare in Figure S2 below the value of the CoE calculated during the optimization and the value of the first-order and high-order estimate functions at the same points. Both estimators capture the order of magnitude of the CoE, however the high-order estimator is much more precise. In order to keep the article concise, these figures have not been included in the revised manuscript.

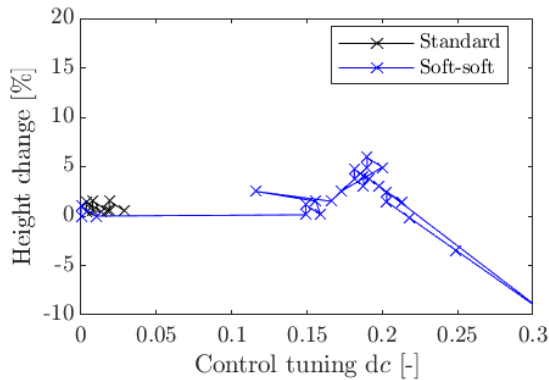

Figure S1: Path of the optimization algorithm in the design space for the standard and soft-soft configurations.

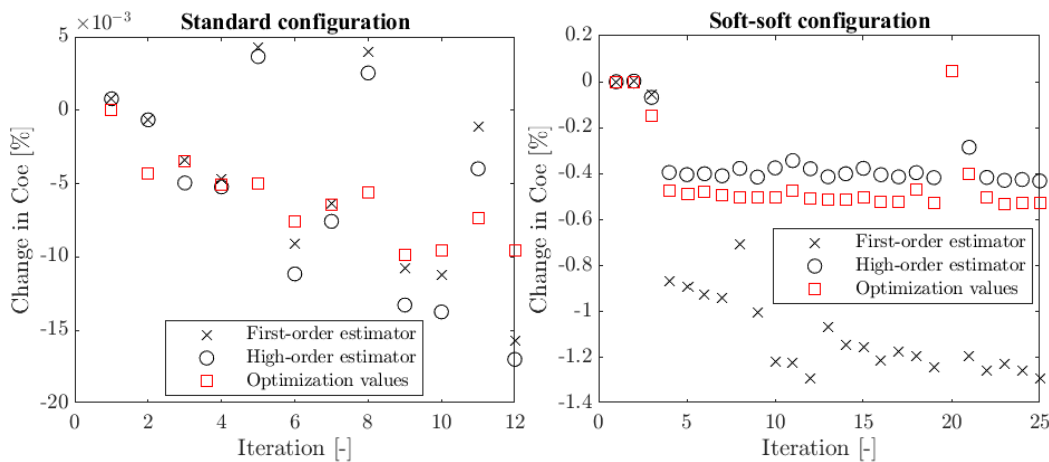

Figure S2: Change of CoE during the optimization process and corresponding value calculated with the estimators.

### Technical corrections

- *p111: control-co design* → *control co-design*  
**Authors:** Corrected.
- *p1120: optimal production* → *optimal energy production*  
**Authors:** Corrected.
- *All units should be typeset according to the standards, i.e., with a space between number and unit. For example, p2128: 13MW* → *13 MW*.  
**Authors:** Corrected.

- *avoid double parentheses around citations by absorbing by properly using citation macros. For example, p2l29: (e.g. Zahle et al. (2016)) → (e.g. Zahle et al., 2019) [check macros such as \citet and \citep]*  
**Authors:** Corrected.
- *p2l37: “A promising problem for CCD applications is likely to be sensitive to control tuning.”: this is a central assumption that requires more justification*  
**Authors:** We have added the following sentence with a reference to a review paper in order to address this comment: (l. 37-38) “Indeed, an integrated design approach is recommended when the physical system and control system are strongly coupled (Allison and Herber, 2014).”
- *p3l70: at each iteration → at each iteration of the optimization algorithm*  
**Authors:** Corrected.
- *p3l76: “If Problem 2 can benefit from a CCD formulation”: this makes no sense, as Problem 2 does not depend on c (only on a constant c\_r); likely you want to reformulate this*  
**Authors:** We believe that this is explained immediately below, where we explain that the method works by perturbing the value of c\_r
- *p3l78-84: The mathematical notation used here needs to be introduced more elaborately and in a more structured way, so in advance of its usage. Moreover, there should be some discussion of the meaning of dx\*, as the natural thing to do would be to consider x(c\_r) and x(cr+dc), but the latter is effectively replaced by x(c\_r) + dx\* (I am not yet fully convinced that using dx\* isn't introducing some implicit assumptions)*  
**Authors:** we are not sure we completely understand this comment. We believe that the perturbation analysis of the solution is developed in a correct and consistent way, as also demonstrated by the model problem studied in the appendix.
- *p3l84/p4l90: Define ‘stationarity condition’/‘stationary point of the objective function’ formally/explicitly (I guess it is there where the gradient is zero?).*  
**Authors:** The term “stationarity condition” is standard in the field of optimization, and refers to the name of one of the first-order optimality conditions. It is defined explicitly in Eq. 6. In addition, we have added the definition of stationary point on Line 92 (the gradient of the function is zero).
- *p4l97: f(x,c\_r,λ): what is the λ doing there?*  
**Authors:** Sentence corrected, the objective function does not depend on lambda here.
- *p4l102-103: Why not mention assumptions explicitly? The current formulation is vague.*  
**Authors:** The assumptions related to the KKT conditions are outside the scope of this paper, and can be found in relevant textbooks. Therefore, the sentence was removed in the revised manuscript.
- *p4l112: It would be easier to follow if the explanation of the figure is in-text and the caption is just the title of the figure.*  
**Authors:** The caption of the figure has been simplified, and the explanation has been moved to the main text.
- *p5l115-116: Why not mention assumptions explicitly? The current formulation is vague. (Likely you mention them after Eq. 9, but then the connection should be made explicit.)*  
**Authors:** The validity assumptions for the first-order estimator is made more explicit by writing it right after Eq. 9.
- *p5l120: finite → small? infinitesimal?*  
**Authors:** Corrected.

- p5|121-122: Again ‘validity assumptions’ are not made explicit (it may be as easy as referring back explicitly to some lines above)

**Authors:** The validity assumption for the high-order estimator are made more explicit by writing them right after Eq. 10 and as a list.
- p5Fig1caption: define ‘coupling’ formally/explicitly in the text before this aspect of the figure is discussed

**Authors:** Corrected
- p6Eq11:  $\delta f$  should be defined before being used

**Authors:** Corrected
- p6|144: noted  $m \rightarrow$  denoted by  $m$

**Authors:** Corrected.
- p6|147: discussion of marginal effect of control on AEP is vague/informal; can you make it more formal/explicit?

**Authors:** We have clarified the sentence: (l. 222-223) “However, the net annual energy production is mostly driven by the tower height, whereas the impact of the controller tuning and the inner tower design is marginal in comparison”
- p7|163-164: “Therefore, the estimator in Eq. (9) is defined using this constraint only and applied to the tower mass minimization problem.”: I think this statement should become more prominent/explicit

**Authors:** In the revised manuscript, this sentence has been removed and replaced by Section 4.
- p7|165: ‘As a result’: say explicitly that Eq. 9’s first term therefore becomes zero.

**Authors:** Corrected: (l. 209-210) “The objective function for the considered problem is  $m(t, d, h)$  and does not depend on the control parameter. Therefore the first term in the estimator equations is zero:  $\nabla f = \nabla m = 0$  and  $\Delta f (dc) = \Delta m(dc) = 0$ .”
- p7|169-170: “because the active set is robust, there is little interaction between constraints, and the objective and constraints tend to be nearly linear around the optimum”: this statement really needs some justification/references

**Authors:** The importance of the validity assumptions was not clear in the submitted manuscript. We have clarified in the methodology section that a violation of the validity assumption affects primarily the precision of the method. The statement regarding the has been reformulated:  
 (l. 204-208) “Regarding the validity assumptions of the high-order estimator, a preliminary study on the impact of the control tuning on the fatigue damage constraint ensured the robustness of the active set with the chosen range of control tuning variation. In addition, the objective and constraints can be assumed to be linear in  $\vec{x}$  provided the change of design is small. However, the validity assumption related to the coupling is more difficult to prove due to the complexity of the problem considered. Therefore, the high-order estimator may be unprecise.”
- p7Fig2caption: the information in the caption should be integrated in the text; currently this part is really confusion, also due to the fact that the relevant information is spread over text and caption instead of forming a unified discussion.

**Authors:** Figure 2 has been removed from the revised manuscript. The CoE estimate function is described more precisely in Section 4, which should address this comment.
- p7|173: ‘surrogate model’: explain better what the role of the true LCOE is, e.g., by expanding Eq. 14 with an extra part ‘= ...’ making the connection explicit

- Authors:** See previous comment.
- p9|217-218:  $1e^{-...} \rightarrow 10^{\{-...}}$

**Authors:** Corrected.
- p10|237-238: “Adding this constraint also reduces the relative importance of fatigue, reducing the potential for CCD, but also showing why the soft-soft tower has lower mass than the standard configuration.”: vague, so make more explicit

**Authors:** The sentence has been modified as follows: (l. 254-256) “The Lagrange multipliers associated with fatigue are one order of magnitude smaller, showing a lower relative importance of these constraints and a reduced potential for CCD compared to the soft-soft case”
- p12|Table1: Make it explicit that the second-order estimator is considered here

**Authors:** Corrected.
- p12|260-265: This paragraph really needs to be expanded to its own subsection at least, as computational cost quantification and discussion is severely underrepresented in the paper. Also, ‘12 evaluations’ are mentioned here, but shouldn’t that be 16 as 4 times 4?

**Authors:** A new section dedicated to the computational effort has been added. The calculation of the computational effort for the high-order estimator is also detailed.
- p14|295-296: “We can expect that including this feature in the controller design would translate into reduced benefits.”: clarify

**Authors:** This sentence has been removed in the revised manuscript.
- p16|EqB3:  $dc^* \rightarrow dc$

**Authors:** Corrected.
- p16|EqB4:  $f(dc) \rightarrow f(x^*+dx^*, dc)$ ?

**Authors:** The notation  $\Delta f(dc)$  is defined explicitly in the next line.
- p17|349-350: “we assume that the constraints that do not depend on  $x$  contribute marginally to the change of optimum”: is this a reasonable assumption (justify)

**Authors:** Upon further examination of the explanation of this validity assumption, it was found that it is not necessary for the high-order estimator and the corresponding proof. This is because the following equation (noted B6 in the manuscript) is valid for all active constraints, and not only active constraints that depend on  $c$ :

$$\nabla_x g_i(x^*, c_r)^T dx^* = -\Delta g_i(dc) + o(|dc|^2)$$

The relative contribution of the constraints to the change of optimum is reflected in the Lagrange multipliers. In the submitted manuscript, we included an example in Appendix C showing the impact of this validity assumption. However, the presented results were obtained with an error in the calculation of the high-estimator. Figure S3 presents the updated results, showing that the assumption has no impact on the precision of the high-order estimator. As such, we have removed this assumption in the updated manuscript.

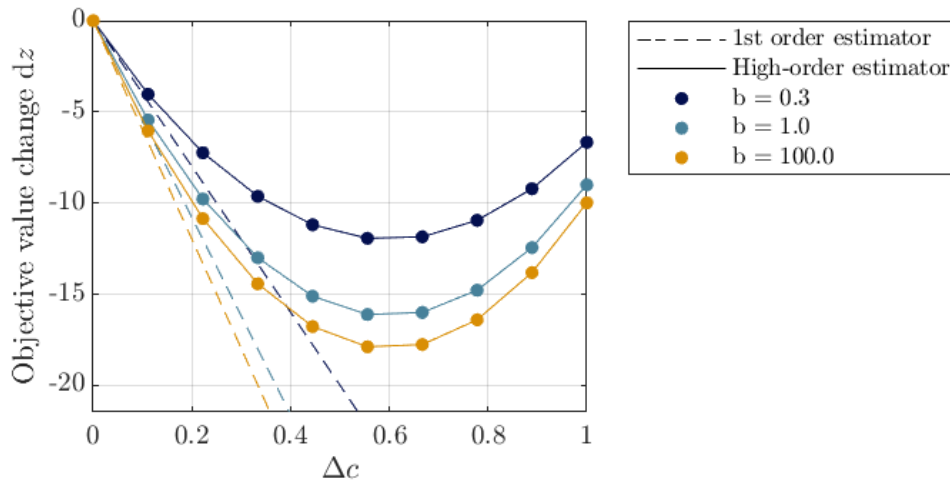

Figure S3: Comparison of the optimal objective value with the first-order estimator and the high-order estimator for problems where the constraint non-dependent on  $c$  interacts to a varying degree with the constraint dependent on  $c$ . The higher the value of  $b$ , the weaker the interaction with the two types of constraints.

- p17EqC1: I was wondering why there is no cross term in  $x$  and  $c$  included.*  
**Authors:** The cross terms between  $x$  and  $c$  are included in the objective function, through the matrix  $\mathbf{P}$ . Instead, we have not included couplings in the constraints in this example, in order to keep the appendix short. However, the impact of a coupling in the constraint is likely to be similar to the one of a coupling in the objective function.
- p18-21: Make it explicit that the titles refer to some assumption whose violation is studied.*  
**Authors:** Corrected.

#### References:

- Allison, J. T., & Herber, D. R. (2014). Special Section on Multidisciplinary Design Optimization: Multidisciplinary Design Optimization of Dynamic Engineering Systems. *AIAA Journal*, 52(4), 691–710. <https://doi.org/10.2514/1.J052182>
- Bottasso, C. L., Bortolotti, P., Croce, A., & Gualdoni, F. (2016). Integrated aero-structural optimization of wind turbines. *Multibody System Dynamics*, 38(4), 317–344. <https://doi.org/10.1007/s11044-015-9488-1>
- Bottasso, C. L., Campagnolo, F., & Croce, A. (2012). Multi-disciplinary constrained optimization of wind turbines. *Multibody System Dynamics*, 27(1), 21–53. <https://doi.org/10.1007/s11044-011-9271-x>
- Jonkman, B. J. and Kilcher, L. (2012) TurbSim User's Guide: Version 1.06.00, NREL Technical Report
- Bossanyi, E. A. (2000). The Design of closed loop controllers for wind turbines for wind turbines, *Wind Energy*, 163, 149–163,450 <https://doi.org/10.1002/we.34>

# ~~How to identify design optimization problems that can be improved with a~~ A sensitivity-based estimation method for investigating control co-design approach? relevance

Jenna Iori<sup>1,3</sup>, Carlo Luigi Bottasso<sup>2</sup>, and Michael Kenneth McWilliam<sup>1</sup>

<sup>1</sup>Department of Wind and Energy Systems, Technical University of Denmark, Frederiksborgvej 399, 4000 Roskilde, Denmark

<sup>2</sup>Wind Energy Institute, Technical University of Munich, 85748 Garching b. München, Germany

<sup>3</sup>Faculty of Aerospace Engineering, Delft University of Technology, Kluyverweg 1, 2629HS Delft, The Netherlands

**Correspondence:** Jenna Iori (j.iori@tudelft.nl)

## Abstract.

Control co-design is a promising approach for wind turbine design due to the importance of the controller in power production, stability ~~and load alleviation~~, load alleviation, and the resulting coupled effects on the sizing of the turbine components. However, the high computational effort required to solve optimization problems with added control design variables is a major obstacle to ~~quantify~~ quantifying the benefit of this approach. In this work, we propose a methodology to identify if a design problem can benefit from control co-design. The estimation method, based on post-optimum sensitivity analysis, quantifies how the optimal objective value varies with a change in control tuning.

The performance of the method is evaluated on a tower design optimization problem, where fatigue load constraints are a major driver, and using a Linear Quadratic Regulator targeting fatigue load alleviation. We use the gradient-based multi-disciplinary optimization framework Cp-max. Fatigue damage is evaluated with time-domain simulations corresponding to the certification standards. The estimation method applied to the optimal tower mass and optimal ~~levelized~~-cost of energy show good agreement with the results of the ~~control-co-design optimization~~, control co-design optimization while using only a fraction of the computational effort.

Our results additionally show that there may be little benefit to ~~use~~ using control co-design in the presence of an active frequency constraint. However, for a soft-soft tower configuration where the resonance can be avoided with active control, using control co-design results in a ~~higher~~ taller tower with reduced mass.

**Keywords:** ~~Control co-design, Multi-disciplinary optimization and design, Wind energy, Fatigue alleviation, Wind turbine tower design, LQR control, Design sensitivity analysis~~

## 1 Introduction

Control co-design (CCD) is a sub-field of dynamic systems design where the controller is designed simultaneously with the structure. Wind turbine design is a promising field of study within CCD because these structures are driven by load constraints,

while at the same time control is important for optimal energy production and for reducing loads (Garcia-Sanz, 2019; Veers et al., 2022).

25 Though CCD is not yet widely used in the field of wind energy, several research groups have shown the potential of the method. Chen et al. (2017) include an automatic controller synthesis for the design of a wind turbine blade with individual pitch control and trailing edge flaps, leading to a decrease in the levelized cost of energy (LCOE). Deshmukh and Allison (2016) achieve an 8 % improvement in Annual Energy Production (AEP) with a CCD approach compared to a sequential approach, considering torque control only and using a simple set of structural constraints and a linearized model for the turbine dynamics. Pao et al. (2021) report how including control tuning in the design process leads to a cost-effective extreme-scale  
30 ~~13MW-13 MW~~ downwind turbine rotor. This result was achieved with an iterative design process instead of a ~~fully-coupled approach~~ fully coupled approach.

Most wind turbine optimization frameworks rely heavily on ~~steady-state analysis (e.g. Zahle et al. (2016))~~ steady-state analysis (Zahle et al., 2016) or a nested/decoupled frozen loads approach (~~e.g. Bottasso et al. (2016))~~ (Bottasso et al., 2016) to reduce the computation effort of the optimization. Yet, CCD requires expensive time domain simulations to be executed  
35 within the optimization loop, to assess the effect of changing the control. Such changes to an optimization framework are expensive, both in the code development phase and ~~to execute once completed~~ during execution. This high computational cost makes it difficult to identify designs relevant ~~for~~ to CCD, since the design process often requires a ~~trial-and-error~~ trial-and-error approach. Therefore, a tool is needed to estimate which problems can benefit from CCD without an excessive computational burden.

40 From a mathematical point of view, the difference between a CCD and a standard physical design optimization problem can be seen as the addition of the design variables describing the controller action. A promising problem for CCD applications is ~~likely to be one that is likely~~ sensitive to control tuning. Indeed, an integrated design approach is recommended when the physical system and control system are strongly coupled (Allison and Herber, 2014). Therefore, we propose a method to estimate how the optimal objective value of a given problem changes when the control changes, in the context of gradient-  
45 based optimization. The estimator is ~~built~~ formulated using post-optimum sensitivity analysis (POSA) (Castillo et al., 2008) on a standard structural optimization problem with fixed control, and can be used to estimate the results of the more complicated CCD optimization. While POSA is not widely used in the field of wind energy, a recent study by McWilliam et al. (2022) uses this approach to identify the design drivers for swept blades.

The proposed estimation method is applied to the design of a wind turbine tower driven by fatigue damage constraints.  
50 Several authors have developed control strategies to reduce fatigue damage (Johnson et al., 2012; Camblong et al., 2012), reducing tower side-side loads by 8 % (Kim et al., 2020) and fore-aft fatigue loads by 14 % (Nam et al., 2013). Since fatigue damage can be a driving ~~constraints~~ constraint for wind turbine ~~tower~~ towers (Canet et al., 2021; Dykes et al., 2018), CCD has the potential to improve the design of this component. In the context of CCD however, fatigue reduction is more challenging due to the many ~~long-running~~ long-running time-domain simulations that are needed for accurate fatigue calculations. Therefore,  
55 an estimation method is particularly relevant for this type of ~~problems~~ problem before applying CCD directly.



Another important constraint in the design of wind turbine towers is the frequency constraint ~~that, which~~ prevents resonance with the rotor rotational frequency. Recent ~~development~~ developments in control design ~~has~~ have allowed to design towers without this constraint, called soft-soft towers, where ~~the~~ resonance avoidance is managed by active control. ~~The soft-soft~~ Soft-soft towers generally have a lower mass than standard ones (also called soft-stiff configuration), and their designs can also be driven by fatigue damage (Dykes et al., 2018). In this work, both the standard and soft-soft configurations are studied in order to assess the performance of the presented estimation method on two different design problems with different sets of constraints.

The paper is organized as ~~follow~~ follows. Section 2 describes two estimation methods: a first-order estimator taking into account a linear dependency of the problem with control tuning, and a high-order estimator ~~including that includes~~ non-linear effects but is also subject to additional assumptions. Section 3 describes the tower design problem and control architecture in ~~details~~ detail, and how to apply the estimator formula in practice. Section 5 compares the estimator to the solution of the corresponding control co-design optimization problem. Finally, the limitations of this study and potential applications are discussed in Section 6. A nomenclature is provided in Appendix A.

## 2 Methodology

We consider the control co-design Problem 1 below, where  $c$  and  $x$  ~~represents~~ represent the control and structural design variables, respectively:

$$\begin{aligned} & \underset{x, c}{\text{minimize}} && f(x, c) \\ & \text{subject to} && g_i(x, c) \leq 0 \quad i = 1, \dots, n. \end{aligned} \tag{1}$$

In the general case, the objective function  $f$  and the constraints  ~~$g_i, i = 1, \dots, n$~~   $g_i, i = 1, \dots, n$  depend on both  $x$  and  $c$ . Most existing wind turbine optimization frameworks do not allow ~~to solve Problem 1 directly. Many for the direct solution of~~ Problem 1. Several frameworks are implemented in such a way that the controller design is fixed during the design process. In this context, adding the control design variable  $c$  to the existing optimization requires significant development effort. In addition, having the control design variable in the optimization problem requires ~~to update~~ updating the time-dependent loads on the structure at each iteration of the optimization. As a consequence, the computational effort required for the optimization becomes large, and ~~it the direct solution of the problem~~ is generally impractical ~~to attempt to solve the problem~~.

Instead, it is possible to solve an optimization problem with frozen control, represented by Problem 2, where the control variable is fixed to its reference value  $c_r$ :

$$\begin{aligned} & \underset{x}{\text{minimize}} && z = f(x, c_r) \\ & \text{subject to} && g_i(x, c_r) \leq 0 \quad i = 1, \dots, n. \end{aligned} \tag{2}$$

The aim of this work is to understand if the design problem benefits ~~by~~ from a CCD approach. In other words, ~~is~~ are there sufficient potential improvements to justify the additional effort to solve Problem 1? If Problem 2 can benefit from a

85 ~~CCD formulation~~reformulation, the optimal objective value is likely to be sensitive to a change in the control parameter  $\mathbf{c}_r$ . This means that solving the problem at  $\mathbf{c}_r$  or  $\mathbf{c}_r + d\mathbf{c}$  will give a significant change in the optimal objective value  $dz^*(d\mathbf{c}) = z^*(\mathbf{c}_r + d\mathbf{c}) - z^*(\mathbf{c}_r)$ . We use post-optimum design sensitivity (Castillo et al., 2008) to estimate  $dz^*(d\mathbf{c})$  from the solution of Problem 2.

90 The change of optimal objective value due to a change of the control parameter  $d\mathbf{c}$  can be written as a first-order approximation using the gradients of  $f$ :

$$dz^*(d\mathbf{c}) = f(\mathbf{x}^* + d\mathbf{x}^*, \mathbf{c}_r + d\mathbf{c}) - f(\mathbf{x}^*, \mathbf{c}_r) \simeq \nabla_x f(\mathbf{x}^*, \mathbf{c}_r)^T d\mathbf{x}^* + \nabla_c f(\mathbf{x}^*, \mathbf{c}_r)^T d\mathbf{c}. \quad (3)$$

In this equation, the change of optimal solution  $d\mathbf{x}^*$  is not directly known, but can be characterized with the first-order optimality conditions: the constraints are satisfied and the stationarity condition, described in the following paragraphs, holds.

95 First, the satisfaction of the constraints means that  $g_i(\mathbf{x}^* + d\mathbf{x}^*, \mathbf{c}_r + d\mathbf{c}) = g_i(\mathbf{x}^*, \mathbf{c}_r) = 0$ ,  $i \in \mathcal{I}$ , where  $\mathcal{I}$  is the set of active constraints. We assume that the active set does not change with  $d\mathbf{c}$ . This equation can be expanded by using a first-order approximation around point  $(\mathbf{x}^*, \mathbf{c}_r)$  on the left-hand term, resulting in:

$$\nabla_x g_i(\mathbf{x}^*, \mathbf{c}_r)^T d\mathbf{x}^* = -\nabla_c g_i(\mathbf{x}^*, \mathbf{c}_r)^T d\mathbf{c}, \quad i \in \mathcal{I}. \quad (4)$$

100 Then, we can relate the gradient of the constraints to the gradient of the objective function  $\nabla_x f(\mathbf{x}^*, \mathbf{c}_r)$  in Eq. (3) using the stationarity ~~conditions~~condition. For unconstrained optimization, the optimum is a stationarity point of the objective function, i.e.  $\nabla_x f(\mathbf{x}^*, \mathbf{c}_r) = 0$ . This condition gives practical methods to find the optimum, e.g. with ~~root-finding~~root-finding algorithms. However, for constrained optimization,  $\nabla_x f(\mathbf{x}^*, \mathbf{c}_r) \neq 0$  in general, in the presence of active constraints. In this case, we can characterize the optimum by considering stationarity points of the Lagrangian function  $\mathcal{L}$  instead, also called augmented cost function:

$$\mathcal{L}(\mathbf{x}, \mathbf{c}_r, \boldsymbol{\lambda}) = f(\mathbf{x}, \mathbf{c}_r) + \boldsymbol{\lambda}^T \mathbf{g}(\mathbf{x}, \mathbf{c}_r), \quad (5)$$

105 where  $\boldsymbol{\lambda}$  are the Lagrange multipliers. Here, we simplify the problem by considering only the active constraints. For values of  $\mathbf{x}$  satisfying the constraints, the value of the Lagrangian function matches the value of the objective function,  ~~$\mathcal{L}(\mathbf{x}, \mathbf{c}_r, \boldsymbol{\lambda}) = f(\mathbf{x}, \mathbf{c}_r, \boldsymbol{\lambda})$~~  $\mathcal{L}(\mathbf{x}, \mathbf{c}_r, \boldsymbol{\lambda}) = f(\mathbf{x}, \mathbf{c}_r)$ . Then, it is possible to find a set of Lagrange multipliers (noted  $\boldsymbol{\lambda}^*$ ) so that the optimum  $\mathbf{x}^*$  corresponds to a stationarity point of  $\mathcal{L}$ , i.e.  $\nabla_x \mathcal{L}(\mathbf{x}^*, \mathbf{c}_r, \boldsymbol{\lambda}^*) = 0$ . Hence, the stationarity condition is obtained:

$$\nabla_x f(\mathbf{x}^*, \mathbf{c}_r) + \sum_{i \in \mathcal{I}} \lambda_i^* \nabla_x g_i(\mathbf{x}^*, \mathbf{c}_r) = \mathbf{0}. \quad (6)$$

110 The Lagrange multiplier can be interpreted as the rate of change of the objective function relative to a change in the constraint function. For a formal proof of the stationarity condition, the reader is referred to the Karush-Kuhn-Tucker optimality conditions and textbooks on convex and non-linear optimization (Boyd and Vandenberghe, 2004). ~~Note that the stationarity condition comes with assumptions on differentiability and strong duality.~~

The stationarity condition is reformulated by post-multiplying it by  $d\mathbf{x}^*$ . Using Eq. (4), the Jacobian of the constraints with respect to  $\mathbf{x}$  can be replaced by the Jacobian with respect to  $\mathbf{c}$ :

$$\nabla_{\mathbf{x}} f(\mathbf{x}^*, \mathbf{c}_r)^T d\mathbf{x}^* = \sum_{i \in \mathcal{I}} \lambda_i^* \nabla_{\mathbf{c}} g_i(\mathbf{x}^*, \mathbf{c}_r)^T d\mathbf{c}. \quad (7)$$

The expression for  $\nabla_{\mathbf{x}} f(\mathbf{x}^*, \mathbf{c}_r)^T d\mathbf{x}^*$  in Eq. (3) can be replaced by Eq. (7), obtaining the following *first order estimator*:

$$dz_{\text{est}}^*(d\mathbf{c}) = \nabla_{\mathbf{c}} f(\mathbf{x}^*, \mathbf{c}_r)^T d\mathbf{c} + \sum_{i \in \mathcal{I}} \lambda_i^* \nabla_{\mathbf{c}} g_i(\mathbf{x}^*, \mathbf{c}_r)^T d\mathbf{c}_i, \quad (8)$$

which is valid under the assumption that the feasible set does not change with  $d\mathbf{c}$ . The first term of the estimator represents how the objective function changes with  $d\mathbf{c}$  assuming the optimal design  $\mathbf{x}^*$  does not change. The second term gives the change in the optimal objective value due to a variation in the constraints, which results in a change of the optimal design  $\mathbf{x}^*$ . This formulation is based on a first-order differentiation ~~and is valid under the assumption that the feasible set does not change with  $d\mathbf{c}$ .~~ Figure 1 illustrates ~~how the~~ the roles of the two terms of the estimator ~~works.~~

A ~~pure~~ purely linear estimator only takes ~~in~~ into account the linear variation of the problem with  $d\mathbf{c}$  and cannot ~~show the effect of~~ capture non-linear effects such as diminishing returns. Thus we propose an extension of the estimator that captures the non-linear ~~behavior~~ behaviour of the constraints, called *high-order estimator*. By using a ~~higher-order~~ higher-order expansion instead of a first-order one, ~~and under appropriate assumptions on the objective function and constraints, the~~ the following formula is obtained:

$$dz_{\text{est}}^*(d\mathbf{c}) = \Delta f(d\mathbf{c}) + \sum_{i \in \mathcal{I}} \lambda_i^* \Delta g_i(d\mathbf{c}), \quad (9)$$

where  $\Delta g_i(d\mathbf{c}) = g_i(\mathbf{x}^*, \mathbf{c}_r + d\mathbf{c}) - g_i(\mathbf{x}^*, \mathbf{c}_r)$ ,  $i \in \mathcal{I}$  and  $\Delta f(d\mathbf{c}) = f(\mathbf{x}^*, \mathbf{c}_r + d\mathbf{c}) - f(\mathbf{x}^*, \mathbf{c}_r)$ . ~~This~~ The high-order estimator is valid ~~assuming that (i) the~~ under the following assumptions:

- the objective function and constraints are linear in  $\mathbf{x}$  ~~and there is~~;
- there are no couplings between  $\mathbf{x}$  and  $\mathbf{c}$ ; ~~(ii) in the objective function and constraints, i.e.  $\nabla_{\mathbf{x}, \mathbf{c}}^2 f$  and  $\nabla_{\mathbf{x}, \mathbf{c}}^2 g$  are negligible;~~
- the active set does not change with a finite small variation  $d\mathbf{c}$ ; ~~and (iii) constraints that do not depend on  $\mathbf{c}$  do not affect the change of optimum.~~

The derivation and explanation ~~for the~~ of these assumptions can be found in Appendix B. ~~Appendix C illustrates how the validity assumptions impacts the performance~~ In case the assumptions are violated, the precision of the estimator is likely to decrease, but the method can still capture the underlying trend effects of varying the control parameter. Appendix C illustrates this aspect on a simple quadratic program. In addition, Fig. 1 illustrates how the ~~assumptions on the coupling impact the estimator validity.~~ violation of the coupling assumption impacts the precision of the estimator. The estimated optimum (white circle) is close to the real optimum (black triangle) in the weak coupling case, but less precise when the coupling is strong.

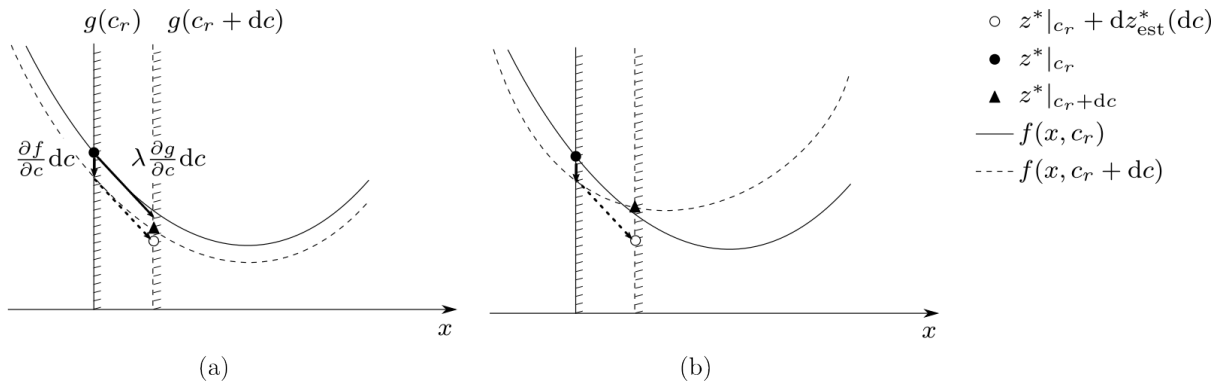

**Figure 1.** Illustration of the estimator on a quadratic problem, with one scalar design variable  $x$  and one constraint  $g$  represented by the vertical line. The problem is represented for the reference value  $c_r$  and in the presence of a variation  $dc$ , when the coupling between  $x$  and  $c$  is for weak (a) and when it is strong (b) couplings. The estimated optimum (white circle) is close to the real optimum (black triangle) only in the weak coupling case.

### 3 Case study

In this section, we present the [tower design](#) case study used to evaluate the estimator. We first describe the tower optimization problem on which the estimator is applied. Then, the method to estimate how the optimal tower mass and leveled cost of energy (LCOE) change with the control tuning are described. The third part reports the [The second part of this section focuses on the adopted Linear Quadratic Regulator \(LQR\) control law and the control tuning used. This section is concluded by describing its parametrization. A description of the analysis and fatigue damage models concludes the section.](#)

#### 3.1 Optimization problem

We consider a wind turbine tower optimization problem with the objective [to reduce the LCOE of reducing the cost of energy \(CoE\)](#). Two configurations of the tower design are considered: a standard configuration, where the natural frequencies of the structure are required [to not not to](#) interact with the rotor rotational frequency, and a soft-soft configuration, where the natural frequencies can be lower than the passing frequency and resonance is avoided through active control. [In this work, we do not consider the resonance avoidance strategy in the design of the controller.](#) The tower design is parameterized with the tower height  $h$ , the diameter  $d$ , and wall thickness  $t$  of each tower segment. [The total tower mass is denoted by  \$m\$ .](#) Geometrical constraints are set on taper, continuity of wall thickness, and maximum tower diameter [to ensure the tower can be built](#). The load constraints,  $g_{D,j}, j = 1, \dots, n_s$  ensure that the fatigue damage does not exceed [the value of 1](#) along the full length of the tower. Finally, for the standard configuration, a frequency constraint is set so that the first and second natural frequencies  $f_1, f_2$  are sufficiently far from the rotors rotor 1P frequency  $f_{1P}$ , [with a threshold  \$\delta f\$ . In this work, the controller design of the soft-soft configuration is kept simple in order to focus on the objective function sensitivity. We assume that the controller is designed in such a way as to operate immediately below and above the resonant frequency, using a classical](#)

frequency skipping approach (Bossanyi, 2000). However, for simplicity, we did not implement this feature in the controller, and we simply avoided running simulations in proximity of the resonant condition.

The optimization is represented by Problem 10, where  $c = c_r$  represents the scalar control tuning set at its reference value:

$$\underset{h}{\text{minimize}} \quad z = \text{LCOECoE}(m^*(h, c_r), h, c_r, \mathbf{d}^*(h, c_r), \mathbf{t}^*(h, c_r))$$

$$\text{with } m^*(h, c_r) = \underset{\mathbf{d}, \mathbf{t}}{\text{minimize}} \{ m(\mathbf{t}, \mathbf{d}, h), (\mathbf{t}, \mathbf{d}) \in \mathcal{S}(h, c_r) \}$$

$$[\mathbf{d}^*(h, c_r), \mathbf{t}^*(h, c_r)] = \underset{\mathbf{d}, \mathbf{t}}{\text{argmin}} \{ m(\mathbf{t}, \mathbf{d}, h), (\mathbf{t}, \mathbf{d}) \in \mathcal{S}(h, c_r) \}.$$

165

(10)

$$(\mathbf{t}, \mathbf{d}) \in \mathcal{S}_1(h, c) \leftrightarrow \begin{cases} g_{D_j}(\mathbf{d}, \mathbf{t}, h, c) \leq 0, & j = 1, \dots, n_s \\ f_k(\mathbf{x}) \geq \frac{f_{\text{IP}}}{1 - \delta f}, & k = 1, 2 \\ \text{Geometrical constraints} \end{cases}$$

$$(\mathbf{t}, \mathbf{d}) \in \mathcal{S}_2(h, c) \leftrightarrow \begin{cases} g_{D_j}(\mathbf{d}, \mathbf{t}, h, c) \leq 0, & j = 1, \dots, n_s \\ \text{Geometrical constraints.} \end{cases}$$

~~Two~~ The following two sets of constraints  $\mathcal{S}_1$  and  $\mathcal{S}_2$  ~~expressed by Eq. (11) and (12)~~ are considered, corresponding to the standard and soft-soft configurations, respectively. ~~The tower mass is noted  $m$ .~~

$$170 \quad (\mathbf{t}, \mathbf{d}) \in \mathcal{S}_1(h, c) \leftrightarrow \begin{cases} g_{D_j}(\mathbf{d}, \mathbf{t}, h, c) \leq 0, & j = 1, \dots, n_s \\ f_k(\mathbf{d}, \mathbf{t}, h) \geq \frac{f_{\text{IP}}}{1 - \delta f}, & k = 1, 2 \\ \text{Geometrical constraints.} \end{cases} \quad (11)$$

~~The control tuning has a direct impact on the optimization problem through the change in the aerodynamics loads and in the dynamic response of the wind turbine. This in turn impacts the fatigue loads. On the other hand, the AEP used to calculate the LCOE is only marginally impacted by the control tuning, since it is based on the average power production, which tends to be relatively insensitive to such changes.~~

$$175 \quad (\mathbf{t}, \mathbf{d}) \in \mathcal{S}_2(h, c) \leftrightarrow \begin{cases} g_{D_j}(\mathbf{d}, \mathbf{t}, h, c) \leq 0, & j = 1, \dots, n_s \\ \text{Geometrical constraints.} \end{cases} \quad (12)$$

Problem 10 is formulated using a nested formulation, where the tower mass  ~~$m$~~  is the objective function of the inner optimization problem and acts as an intermediate variable to calculate the LCOECoE. Solving the equivalent monolithic problem would require excessive computational resources. This is because a large number of aeroelastic simulations ~~is~~ are required

to accurately estimate the loads, ~~and~~. An additional contribution to the computational cost comes from the fact that we use  
180 finite-difference to estimate the gradient of the objective function and of the constraints. To ~~avoid this issue, we use~~ limit cost, a  
frozen-load approach ~~to reduce the computational cost, under the assumption that the load envelope varies slowly with changes~~  
~~in the inner tower design variables  $(d, t)$ .~~ For a given tower height, a beam model of the tower is derived and integrated into  
the complete aeroelastic multibody model of the turbine, which is then used to conduct all necessary aeroelastic simulations.  
~~The corresponding loads are then frozen and used as input for the tower mass optimization.~~ Upon convergence of the inner  
185 optimization, the mass difference between the tower design used for the load evaluation and the tower design found at the  
end of the optimization is evaluated. ~~If the change in design is~~ is used (Bottasso et al., 2016), where the loads are not updated  
~~within the inner optimization problem.~~ If the change between the initial and current designs is greater than a given thresh-  
old, the ~~process is repeated iteratively (Bottasso et al., 2016).~~ aero-elastic simulations are evaluated using the current design to  
~~update the loads, and the process is iterated.~~ This method is valid under the assumption that the load envelope varies slowly  
190 with changes in the inner tower design variables  $(d, t)$ . While this approach can potentially lead to non-optimal design, it is  
widely used in wind energy and provides satisfying results.

### 3.2 Estimator applied to the tower mass and LCOE

In the tower optimization problem represented by Problem 10, ~~only the fatigue constraint has a direct dependence on the~~  
~~controller behavior.~~ Therefore, the estimator in Eq. (9) is defined using this constraint only and applied to the tower mass  
195 minimization problem. In this case, the tower mass is not a function of the control parameter and the gradient of the objective  
function with regards to  $c$  is zero. As a result, the change in optimal tower mass  $m^*$  is estimated with the following expression:

$$dm_{\text{est}}^*(dc) = \sum_{j=1}^{n_s} \lambda_{D,j} \Delta g_{D,j}(dc),$$

where  $\lambda_{D,j}$  represent the Lagrange multipliers of the inner problem associated to the fatigue damage constraint  $g_{D,j}$ . The  
200 validity of the high-order estimator is ensured because the active set is robust, there is little interaction between constraints,  
and the objective and constraints tend to be nearly linear around the optimum.

Illustration of the process used to make the LCOE estimate function  $\text{LCOE}_{\text{est}}$  from the optimal tower mass estimator  $dm_{\text{est}}^*$ :  
the optimal tower mass estimate is obtained over a set of points  $dc_q$  and  $h_q(\mathbf{a})$ , the corresponding LCOE is calculated using a  
simplified cost model **(b)** and a quadratic interpolation is run to form the LCOE estimate function **(c)**

205 The estimator formula cannot be applied directly to LCOE due to the nested formulation of the problem. Instead, we use a  
surrogate model of the LCOE as a function of the tower mass and tower height. This model is then applied to the optimal tower  
mass estimator calculated for different tower heights. The process is illustrated in Fig. ???. The resulting LCOE estimate can be  
used to gauge the optimal LCOE that would have been obtained by solving the minimization problem including control tuning  
as a design variable, i.e. using CCD. This is done by minimizing the LCOE estimate function over the range of data used to

210 ~~generate the surrogate model, i.e.~~

$$\underline{\text{LCOE}_{\text{est}}^* = \underset{h, dc}{\text{minimize}} \text{LCOE}_{\text{est}}(h, dc).}$$

### 3.2 Control parametrization

We use a wind-scheduled Multi-Input Multi-Output (MIMO) LQR controller with integral action (Bottasso et al., 2012b). The controller states are the tower top displacement and velocity, the rotational speed, the pitch angle, the pitch rate, and the  
215 electrical torque. The integral of the rotational speed is added to eliminate the ~~steady-state~~ steady-state error of the controller. The controller inputs are the pitch angle and the electrical torque. At each wind speed considered ~~in the operational range~~, the controller gains are computed by applying LQR theory to the linearized system of the turbine dynamics, see Hendricks et al. (2008) for more details.

The tuning of an LQR controller is done through the choice of the entries of the weight matrices associated ~~to~~ with the states  
220 and inputs, noted  $\mathbf{Q}$  and  $\mathbf{R}$ . In this work, the controller is tuned by changing the diagonal term of  $\mathbf{Q}$  associated ~~to~~ with the tower top velocity, labelled  $c$ . The following expression reports the parametrization of the weight matrices:

$$\mathbf{Q}(c) = \begin{bmatrix} 0 & & & & & & \\ & c & & & & & \\ & & 0 & & & & \\ & & & \frac{1}{\beta_{\max}^2} & & & \\ & & & & 0 & & \\ & & & & & & q \end{bmatrix}, \quad \mathbf{R} = \begin{bmatrix} r & 0 \\ 0 & 0.1 \end{bmatrix}, \quad \text{with} \quad \begin{cases} q = \min(0.1, 0.015 \cdot (V - 3) + 0.01) \\ r = \min(1.0, \max(0.1, 1 - 0.18 \cdot (V - 9))) \end{cases} \quad (13)$$

where  ~~$c=0$  is the nominal control tuning and~~  $\beta_{\max}$  is the maximum pitch angle of the turbine power regulation strategy. ~~A gain schedule is created by varying the~~ The parameters  $r$  and  $q$  ~~over the operational range.~~

225 ~~The choice of parametrization was done by doing a sensitivity analysis of the diagonal entries of the matrices  $\mathbf{Q}$  and  $\mathbf{R}$  on fatigue damage, power production, and ultimate loads. The weight matrix entry associated to the tower top velocity was found to give a good~~ are used for gain-scheduling and are varied according to the wind speed  $V$ . The reference value for the control tuning is  $c_r = 0$ .

Figure 2 shows that, by varying the only free parameter  $c$ , the average fatigue damage can be reduced by up to 6.8 %.  
230 ~~However, the~~ fatigue damage reduction, without affecting the standard deviation of the power production in a significant manner varies depending on where the fatigue damage constraint is calculated on the tower.

### 3.3 Analysis model

The numerical experiments presented in this work are conducted using the multi-disciplinary wind turbine design optimization framework  $C_p\text{-max}$ . The details of the framework can be found in the available literature (Bottasso et al., 2012a, 2014, 2016).  
235 We highlight the aspects that are important for ~~tower~~ the tower design optimization and fatigue calculations in this section.

The tower is modelled as a steel tubular structure, divided ~~in~~ into  $n_e$  elements. Each tower element is characterized by its radius at the top and bottom, and its ~~wall thickness~~ wall thickness. The tower is then modelled as a non-linear geometrically

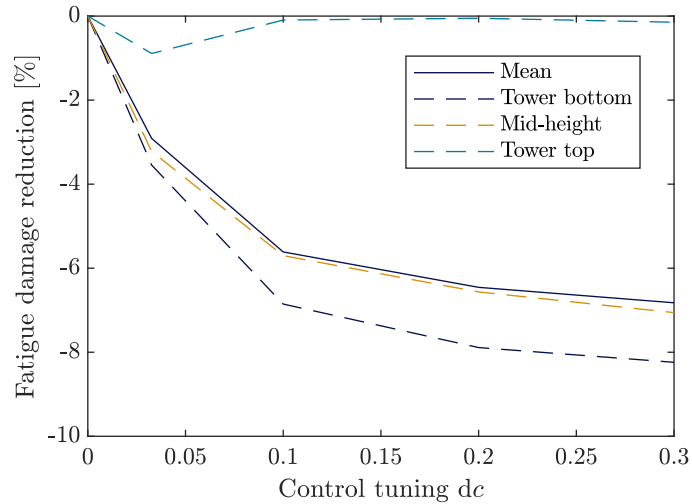

**Figure 2.** Impact of the control tuning on the mean fatigue damage, and at three locations along the tower.

exact ~~shear and torsion deformable~~ shear- and torsion-deformable beam. This is used in turn in the multi-body model of the wind turbine for the aeroelastic simulations, using the solver Cp-Lambda. The aerodynamics of the wind turbine are ~~modeled~~ modelled using the Blade Element Momentum method.

The fatigue load analysis is performed according to certification standards (International Electrotechnical Commission, 2005). Simulations are run from the cut-in to the cut-out wind speed with increments of  $2\text{ m}\cdot\text{s}^{-1}$ . At each considered wind speed, ~~simulations a turbulent wind field is generated with TurbSim (Jonkman, 2009).~~ Simulations are run for ~~600s~~ 600 s for 6 different turbulent seeds, excluding ~~the an~~ an initial transient period of 30 s. Once the aeroelastic simulations are run, loads are extracted at  $n_s$  stations along the tower to compute the stress loading on the structure. A rain-flow counting algorithm is then used on the stress time history to identify the number of loading cycles and their amplitude. ~~Miners~~ Miner's rule and the material S-N curve is used to estimate the lifetime fatigue damage at each station (Sutherland, 1999).

## 4 Results

~~In this section,~~ The cost of energy is calculated following the NREL cost model (Fingersh et al., 2006):

$$\text{CoE}(m, h, c, d, t) = \frac{\text{FCR} \cdot \text{ICC}(m)}{\text{AEP}^{\text{net}}(h, c, d, t)} + \text{AOE}, \quad (14)$$

where the fixed charged rate FCR and the annual operating expenses AOE are assumed to be independent of the design variables. The initial capital cost ICC varies only with the tower mass  $m$  (which, in turn, depends on tower height  $h$ , controller tuning  $c$ , and inner tower design variables  $d$  and  $t$ ), since the rest of the wind turbine design is assumed fixed. Finally, the net annual energy production  $\text{AEP}^{\text{net}}$  is calculated from aeroelastic simulations.



This section describes how the first-order and high-order estimation formulas derived in Section 2 are applied to the estimation method presented in Section 4 is applied to re-design of the tower of tower design optimization problem to estimate the benefits of a control co-design approach. In principle, Problem 10 could be promising for a CCD approach since the control tuning  $c$  has a direct impact on the dynamic response of the wind turbine, which in turn influences fatigue loads. As a result, it is reasonable to expect that the integrated design of control and tower could improve the design through reductions in the fatigue damage constraints.

The estimation formulas presented in Section 4 are derived from a monolithic optimization problem, not a nested one. Therefore, it is not possible to apply it directly to Problem 10. Instead, we apply Eq. (8) and (9) to the nested optimization problem, which is monolithic. Regarding the validity assumptions of the high-order estimator, a preliminary study on the IEA 3.4 MW reference onshore wind turbine (Bortolotti et al., 2019). We first study the impact of the control tuning on the fatigue damage constraints. This provides the constraints variation  $\Delta g_D$  used in constraint ensured the robustness of the active set with the chosen range of control tuning variation. In addition, the objective and constraints can be assumed to be linear in  $x$  provided the change of design is small. However, the validity assumption related to the coupling is more difficult to prove due to the complexity of the problem considered. Therefore, the high-order estimator. Then, we compare the high-order estimator of the may be unprecise.

The objective function for the considered problem is  $m(t, d, h)$  and does not depend on the control parameter. Therefore the first term in the estimator equations is zero:  $\nabla_c f = \nabla_c m = 0$  and  $\Delta f(dc) = \Delta m(dc) = 0$ . Among the constraints of the problem, the fatigue damage constraint is the only one impacted by the tuning of the controller. Therefore, the second term of the estimation formulas only depends on  $g_{D,j}$ ,  $j = 1, \dots, n_s$ . This leads to the following estimate functions for the change in optimal tower mass to optimization results. Finally, the tower mass estimator is used to assess how the optimal LCOE would change by:

$$dm_{\text{est}}^*(dc) = \begin{cases} \sum_{j=1}^{n_s} \lambda_{D,j} \nabla_c g_{D,j} dc & \text{First-order} \\ \sum_{j=1}^{n_s} \lambda_{D,j} \Delta g_{D,j}(dc) & \text{High-order} \end{cases} \quad (15)$$

where  $\lambda_{D,j}$  represent the Lagrange multipliers of the inner problem associated with the fatigue damage constraint  $g_{D,j}$ . The Lagrange multipliers are obtained by solving the nested optimization at the reference value of the control parameter  $c_r$ . The terms  $\nabla_c g_{D,j}$  and  $\Delta g_{D,j}(dc)$  are calculated by running aeroelastic simulations and evaluating the fatigue damage for different values of  $dc$  and using the optimal tower design  $(d^*, t^*)$  obtained with the reference control tuning. The terms  $\nabla_c g_{D,j}$  are evaluated using forward finite differences with a step of 0.03.

While the estimator formula cannot be applied directly to the outer optimization problem, it can inform on the sensitivity of CoE with regard to control changes. In Eq. (14), CoE depends on the controller tuning for the calculation of the AEP and

285 the ICC through the optimal tower mass  $m^*$ . However, the net annual energy production is mostly driven by the tower height, whereas the impact of the controller tuning and the inner tower design is marginal in comparison:  $AEP^{net}(h, c, d, t) \simeq \tilde{AEP}_{est}^{net}(h)$ . The following CoE estimate is written as a function of tower height and control tuning only:

$$\text{CoE}_{est}(h, dc) = \frac{\text{FCR} \cdot \text{ICC}(m_{est}^*(h, c_r + dc) + dm_{est}|_h(dc))}{\tilde{AEP}_{est}^{net}(h)} + \text{AOE}. \quad (16)$$

290 The term  $dm_{est}$  is varied with the tower height. The Lagrange multipliers are updated with  $h$ . However, the change in fatigue damage constraints is calculated for the reference tower height  $h_0$  only, assuming that the term is relatively insensitive to height changes.

This function can be used to gauge the optimal CoE that would have been obtained by solving the minimization problem including control tuning as a design variable, i.e. using CCD. This is done by minimizing the CoE estimate with respect to  $h$  and  $dc$ :

$$\text{CoE}_{est}^* = \underset{h, dc}{\text{minimize}} \text{CoE}_{est}(h, dc). \quad (17)$$

## 5 Results

In this section, the estimation method presented in Section 4 is applied to re-design the tower of the IEA 3.4 MW reference onshore wind turbine (Bortolotti et al., 2019). We compare the high-order estimator of the optimal tower mass and CoE to optimization results. The computational effort of the estimation method is reported at the end of the section.

300 All optimization problems are solved using the active set optimization algorithm implemented in the `fmincon` routine of MATLAB (The MathWorks Inc., 2019). The outer optimization is solved with a tolerance on the expected objective function change  $\epsilon_{obj} = 1e-5$ ,  $\epsilon_{obj} = 10^{-5}$ . The inner optimization is solved with  $\epsilon_{obj} = 1e-4$ ,  $\epsilon_{obj} = 10^{-4}$ , and with a tolerance on constraint violation  $\epsilon_{con} = 1e-2$ ,  $\epsilon_{con} = 10^{-2}$ . The objective function for the outer and inner problems are both scaled by the corresponding value of the initial design. The number of tower elements is  $n_e = 10$ , and the number of fatigue damage  
305 constraints is  $n_s = 19$ . The threshold for the frozen-load method is set to 1%.

### 5.1 **Control action on the fatigue damage constraint**

~~Fatigue damage is evaluated for different values of the control tuning variation  $dc$  on a reference tower design. This tower design corresponds to the solution of the inner optimization of Problem 10, solved for  $c_r = 0$  and for the reference tower height  $h_r = 110$  m. Figure 2 shows that on average, varying the control tuning from 0 to 0.3 reduces the fatigue damage by 6.8%. The fatigue damage reduction varies depending on where the fatigue damage constraint is calculated on the tower. In particular, the control tuning has a marginal impact at the tower top, corresponding to Constraint 19 in Fig. 2. Impact of the control tuning on the fatigue damage on average and at three locations along the tower, where Constraint 1 and 19 correspond to the tower bottom and top, respectively.~~

310

## 5.1 Estimator performance on the optimal tower mass

315 In this section, the change in optimal tower mass due to a control tuning variation is estimated ~~using the results of the previous section. The estimator is then~~. Then, this estimate is compared to the solution of the tower mass optimization problem run for different variations of the control parameter at the reference tower height.

We first look at the importance of the different constraints on the design, by solving the inner tower optimization problem with fixed control tuning  ~~$c_r = 0$~~   $c = 0$  and fixed tower height  $h_r = 110$  m. Figure 3 reports the optimal design and the Lagrange  
320 multipliers for the two considered configurations. For both configurations, the designs are similar. However, the presence of the frequency constraints in the standard configuration drives the wall thickness up in the bottom half of the tower. Analysis of the Lagrange multiplier ~~show~~ shows that for the soft-soft configuration, geometric constraints are the primary drivers. However, these constraints are also insensitive to control tuning. The next most important constraint is fatigue, which can be mitigated by control, indicating potential benefits from CCD. In the standard configuration, the largest Lagrange multiplier is associated with  
325 the added frequency constraint, with  $\lambda_f = 2.44$ . ~~Adding this constraint also reduces the~~ The Lagrange multipliers associated with fatigue are one order of magnitude smaller, showing a lower relative importance of ~~fatigue, reducing the these constraints and a reduced~~ potential for CCD ~~but also showing why compared to~~ the soft-soft ~~tower has lower mass than the standard configuration. case.~~

Using the value of the Lagrange multipliers, the first-order and high-order estimators are calculated and reported in Fig. 4.  
330 The results of the optimization for  ~~$dc = 0.1, 0.2$~~   $dc = 0.1, 0.2$ , and 0.3 are also reported. The high-order estimator accurately predicts the change in optimal mass for the standard configuration, whereas it under-predicts the results for the soft-soft configuration. Both estimators are able to show that the soft-soft configuration benefits significantly more from a change in control tuning than the standard one, in accordance with the constraint analysis. However, the high-order estimator more precisely quantifies this benefit, whereas the first-order estimator fails to capture the effect of diminishing returns on controller  
335 tuning.

## 5.2 Estimator performance on the ~~LCOE~~CoE

In this section, ~~the optimal LCOE is estimated using the results of the previous sections and compared to the results of the control co-design optimization. We~~ we want to understand if the ~~LCOE~~CoE can be reduced by the combined action of control load alleviation and ~~changing the~~ changed tower height through CCD, and if the proposed estimation method can predict the  
340 CCD results.

Figure 5 reports the contour plot of the ~~LCOE~~CoE estimate function for the standard and soft-soft configurations, calculated as described in Section 4 for different tower heights ( $0.9h_r, h_r, 1.1h_r, 1.2h_r$ ) and for  ~~$dc = 0, 0.1, 0.2, 0.3$~~   $dc = 0, 0.03, 0.1, 0.2, 0.3$ . Both the first-order and high-order estimate functions are represented. As expected, there is little coupling between the tower height and the control parameter in the standard configuration, with the ~~LCOE~~CoE showing only marginal variations with  
345 control tuning. For the soft-soft configuration instead, the ~~LCOE~~CoE can be reduced by simultaneously changing the control parameter and the tower height. The estimated change in optimal ~~LCOE~~CoE is calculated as the minimum of the estimate func-

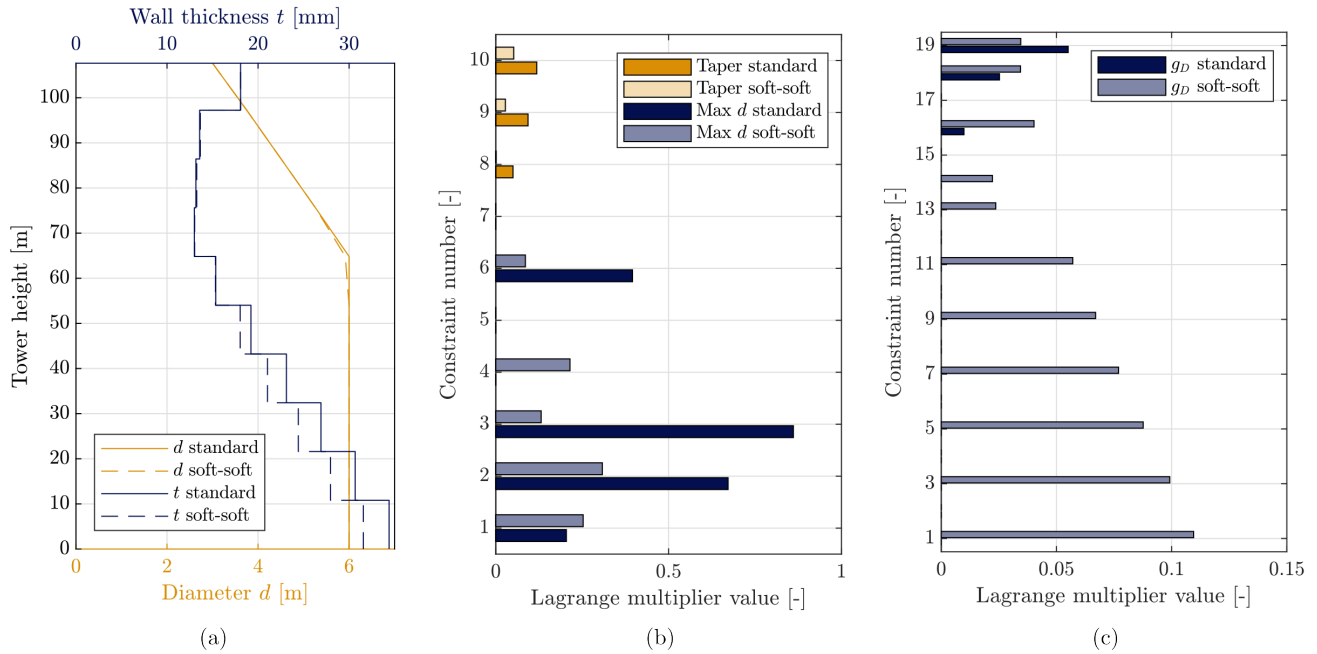

**Figure 3.** Characteristics of the optimal standard and soft-soft tower designs for the reference height  $h_r = 110$  m and control tuning  $e_r = \theta c = 0$ : optimal tower design (a) optimal Lagrange multipliers associated to the fatigue-damage-geometric (b)  $\tau$ , and geometric-fatigue-damage constraints (c).

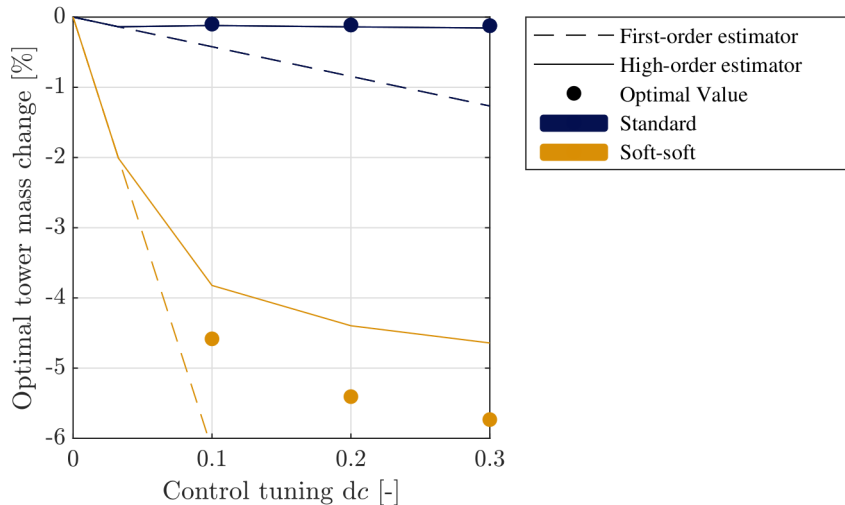

**Figure 4.** Comparison between the optimum mass change  $dm^*$  and the estimated mass change  $dm_{est}^*$  calculated with the first-order and high-order estimator, for different values of the control parameter and for the two configurations. The tower height is fixed to the reference height.

tion, and marked as a white circle in Fig. 5 as a cross and a white circle for the first-order and high-order methods, respectively.

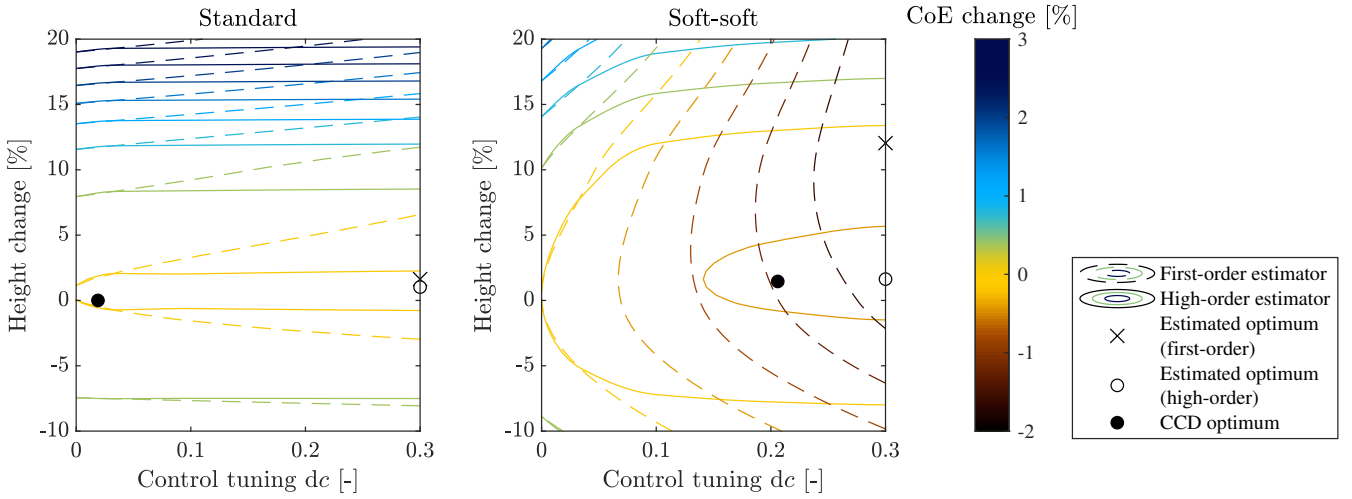

**Figure 5.** Relative change of  $LCOE/CoE$  as a function of the tower height change and control tuning parameter calculated using the first-order and high-order estimator/estimators, for the standard and soft-soft configuration. The reference  $LCOE$ -value  $CoE$  is the optimal  $LCOE$ -value for the non-CCD/non-CCD problem with  $e_r = 0, c = 0$ .

In order to assess the accuracy of the  $LCOE/CoE$  estimator, we solve the tower optimization problem with a non-CCD formulation (corresponding to Problem 10 with  $e_r = 0, c = 0$ ), and with a CCD formulation with bounds on where the control tuning  $e \in [0, 0.3]$  is bounded between 0 and 0.3. Table 1 reports the change in optimal  $LCOE/CoE$  brought by the use of CCD calculated directly with the optimization results and with the estimation method. The estimation method correctly predicts (first-order and high-order). The two estimation methods correctly predict that the soft-soft configuration benefits much more from CCD than the standard configuration. In addition, the estimated improvement is accurate in the high-order case compared to the optimization results. Instead, the first-order estimator significantly over-predicts the benefits of CCD, which is coherent with the limitations of the approach. We note that the estimated change in optimal design is far from the actual one in Fig. 5. This is coherent with the goal of the presented method to quantify the sensitivity of the optimal objective value and not of the optimum.

**Table 1.** Change of Percentage improvement on the optimal  $LCOE$ -between  $CoE$  using a CCD and a non-CCD approach, calculated using with optimization results and the estimation method and using optimization directly.

|                         | CCD-Optimization | Estimator First-order estimator | High-order estimator |
|-------------------------|------------------|---------------------------------|----------------------|
| Standard configuration  | -0.01 %          | -0.14 %                         | -0.02 %              |
| Soft-soft configuration | -0.53 %          | -2.12 %                         | -0.45 %              |

In terms of computational cost, calculating the LCOE estimator required solving four tower mass optimization problems and evaluating the fatigue damage for four values of the control tuning, resulting in 12 evaluations of the full set of aero-elastic simulations for each configuration. In comparison, solving the CCD problem required solving the inner problem and running the full set of simulations 50 times for the soft-soft configuration and 20 times for the standard configuration. Therefore, the presented estimation method is able to identify which configuration benefits from a CCD formulation, with a fraction of the computational effort of the actual optimization.

The results of the optimization for the two configurations are reported in Table 2. Table 2 documents the optimization results used to compute the data in Table 1. The data shows that the optimal CCD soft-soft tower is 2.8 % lighter and 1.5% higher than the version calculated without CCD, which implies a gain in power capture in sheared inflow. This reduction in tower mass and increase in power capture explains why the LCOE-CoE is more impacted for the soft-soft configuration than for the standard configuration. While the estimator performs well on the change in optimal LCOE, it does not predict well the change in design. Indeed, Fig. 5 shows that the estimated change in optimal design is far from the actual one. This is likely caused by the decreasing accuracy of the estimator as  $d_e$  increases.

**Table 2.** Comparison Characteristics of the optimal objective value design for the standard non-CCD and soft-soft configurations CCD problems, when calculated with and without a CCD formulation for the standard and soft-soft configuration. The percentage change between the CCD and the non-CCD cases is reported in parentheses.

|                    |          | Standard non-CCD | Standard CCD     | Soft-soft non-CCD | Soft-soft CCD   |
|--------------------|----------|------------------|------------------|-------------------|-----------------|
| Tower height $h$   | [m]      | 110              | 110.6 (+0.5 %)   | 110               | 111.6 (+1.5 %)  |
| Control tuning $c$ | [-]      | 0                | 0.019            | 0                 | 0.203           |
| Tower mass $m^*$   | [t]      | 331.07           | 334.08 (+0.9 %)  | 311.33            | 302.47 (-2.8 %) |
| AEP                | [GWh]    | 14.955           | 14.977 (+0.1 %)  | 14.955            | 15.014 (+0.4 %) |
| LCOE-CoE           | [\$/Mwh] | 41.481           | 41.477 (-0.01 %) | 41.235            | 41.016 (-0.5 %) |

### 5.3 Computational effort

In terms of computational costs, calculating the high-order estimator requires evaluating (i) the Lagrange multipliers by solving the optimization problem at the reference control, and (ii) the constraints for different values of the control parameter. In this section, we compare this computational effort to the one needed to solve the CCD optimization problem, applied to the CoE.

Table 3 reports different metrics to compare the computational cost between the high-order estimator and the CCD optimization. The number of evaluations of the full set of aero-elastic simulations, noted  $n_{eval}$ , is used as the main comparison metric, since it is the most computationally expensive step of the design process. The fatigue damage constraints are evaluated for four different values of the control tuning, and require one full-set evaluation each. The Lagrange multipliers are evaluated for four different tower heights, and require between one and two full-set evaluations each, depending on the number of iterations in the frozen-load loop. As a result, the estimator is calculated using a total of 11 or 12 full-set evaluations depending on the configuration. Instead, the CCD optimization requires 20 and 50 full-set evaluations for the standard and soft-soft

385 configurations, respectively. In terms of wall time, the estimation method is computed in around a half and a sixth of the time required to solve the CCD problem for the two configurations. Therefore, the presented estimation method is computationally efficient. We note that the number of iterations for the outer optimization for the two CCD cases is low. For more complex problems, or when using a tighter optimization tolerance, the number of iterations is likely to increase significantly, and the computational effort of the CCD process will also increase.

**Table 3.** Computational effort for the CoE estimator and for the CCD optimization: number of iterations for the outer optimization  $n_{iter}$ , number of evaluation of the full set of aero-elastic simulations  $n_{eval}$ , and wall time relative to the CCD case.

|                           |                      | $n_{iter}$ | $n_{eval}$ | Wall time relative to CCD |
|---------------------------|----------------------|------------|------------|---------------------------|
| Standard configuration *  | High-order estimator | -          | 11         | 0.54                      |
|                           | CCD                  | 4          | 20         | 1.0                       |
| Soft-soft configuration * | High-order estimator | -          | 12         | 0.16                      |
|                           | CCD                  | 6          | 50         | 1.0                       |

## 6 Discussion

A CCD approach can incur major computational costs when compared to the simpler non-CCD optimization. At the same time, our results show that CCD is not always guaranteed to provide benefits to the final design compared to a more straightforward non-CCD approach. Without knowing a-priori the potential benefit, there is a significant risk, in terms of engineering time, code development and computational resources, in attempting a CCD optimization. This work ~~demonstrates~~ suggests that results from the simplified optimization problem can be used in conjunction with the high-order estimator, to determine whether a given problem can benefit from ~~taking~~ a CCD approach. The first-order estimator shows similar results, ~~however fails to capture~~ the effect of diminishing returns from controller tuning, with a reduced precision. Furthermore, the analysis of the Lagrange multipliers and constraint sensitivity in the proposed method gives a justification for why a CCD approach would fail. This information is generally not readily available when running a CCD optimization directly, because optimization algorithms can fail for technical reasons (inadequate parameters, scaling or problem formulation).

The method is applicable ~~for to~~ similar problems where the optimum design is driven by a load constraint, when loads can be alleviated by control action, ~~for example (for example,~~ the design of wind turbine support structures or blades ~~in).~~ The computational cost reduction should be similar in problems where the fatigue damage constraints are driving the design. In cases where the driving constraints are easier to evaluate, there should be a greater reduction in computational effort, since the estimator would be less expensive to compute. In addition, while the estimation method was developed to target CCD applications, the mathematical derivations and associated assumptions are developed in the general case, where  $c$  can be any parameter. Therefore, ~~the method it~~ can be applied to any optimization problem to disentangle the effects of one parameter ~~on~~ from the rest of the solution.

The ~~validity-precision~~ of the high-order estimator depends on ~~strong-assumption~~ several assumptions on the objective functions and constraints. When the assumptions are violated, the estimator can under-predict the benefits of CCD, as shown in our results. In addition, the estimator uses local sensitivity information of the non-CCD optimum ~~and~~, and therefore it will  
410 be inaccurate when a CCD approach significantly changes the design. ~~Therefore~~ Consequently, there may still be a benefit of using a CCD approach, even if the estimator fails to show it.

In this study, we perform CCD using one tuning parameter of the LQR controller. ~~The~~ However, the proposed method is general and does not depend on the control architecture, ~~but was verified in a case where the controller is tuned using only a few variables. However, CCD can be performed in several other ways.~~ The applicability of the method to parametrizations  
415 with a large number of design variables ~~, for example open-loop control in the context of direct transcription,~~ is left for future work on the topic.

Finally, this work shows how CCD can be used for the design of wind turbine towers. In the presence of an active frequency constraint, CCD may not give significant improvements. Instead, the use of active load alleviation enables a taller and lighter-mass tower compared to the non-CCD design. ~~The control used for the soft-soft configuration did not include an active resonance avoidance strategy. We can expect that including this feature in the controller design would translate into reduced benefits. In addition, our~~ Our results are specific to one particular wind turbine and may not be generally applicable. ~~However, these results~~ Notwithstanding these limitations, the results reported here highlight the importance of doing performing a thorough analysis of the driving constraints through the use of Lagrange multipliers before attempting ~~to solve~~ a complex and computationally expensive optimization.

## 425 7 Conclusion

This study shows how design sensitivity analysis can be used to estimate the change of optimal objective value caused by a change in control. Using the solution of an optimization problem with fixed control, we can characterize the results of the more complex control co-design problem without the associated computational effort. Two estimators are presented, based on first-order and high-order approximations, respectively, where the latter captures non-linear effects.

430 The proposed estimation method is applied to the redesign of a wind turbine tower driven by fatigue loads, using an LQR controller targeting fatigue load alleviation. High computational resources are required to calculate fatigue damage accurately, which makes this problem an ideal application for the estimator. Two design configurations are considered: a standard configuration, where a frequency constraint is enforced to avoid resonance with the rotational frequency of the rotor, and a soft-soft configuration, where resonance is avoided using active control. The proposed first-order and high-order estimators are applied  
435 to the optimal tower mass and optimal ~~LCOE~~ CoE problems. We have shown that the high-order estimator accurately predicts how the tower mass changes with control tuning, compared to optimization results. The first-order estimator is inaccurate for large values of control tuning, but captures the difference between the standard and soft-soft configurations. Combined with ~~an LCOE surrogate~~ a simple CoE model, the high-order estimator predicts a 0.45% reduction in optimal ~~LCOE~~ CoE for the soft-soft tower, while running the CCD optimization gives an improvement of 0.53%. The proposed estimation method is ac-



440 curate and uses only a fraction of the computational resources of the CCD optimization. Our results additionally show that the standard tower configuration does not benefit from a CCD approach, due to the presence of an active frequency constraint. Changing the control is beneficial for the soft-soft tower, because the fatigue damage constraint is the primary design driver and can be alleviated by control action. In this case, the use of CCD yields a ~~higher~~ taller tower with lower mass, which ~~impact~~ ~~the LCOE~~ impacts the CoE significantly.

445 As ~~shows~~ shown in this work, design sensitivity analysis allows ~~one~~ to identify relevant design problems for CCD from the results of a simplified non-CCD solution. In a context where computational effort is an obstacle to the wide use of CCD, the proposed method can help identify and quantify the benefits of this approach for wind energy applications.

## Appendix A: Nomenclature

Symbols used for generic optimization problems

|                         |                                                             |
|-------------------------|-------------------------------------------------------------|
| $\lambda$               | Lagrange multipliers                                        |
| $c$ or $c$              | Variables or parameters describing the controller           |
| $c_r$ or $c_r$          | Reference value for the control variables                   |
| $f$                     | Objective function                                          |
| $g_i, i = 1, \dots, n$  | Constraints                                                 |
| $x$                     | Design variable of the optimization problem, except control |
| $z$                     | Objective function value                                    |
| $\mathcal{I}$           | Set of active constraints                                   |
| $\nabla_x \square$      | Jacobian or gradient of $\square$ with regards to $x$       |
| $\square^*$             | Value at the optimum                                        |
| $d\square$              | Small variation                                             |
| $d\square_{\text{est}}$ | Estimated value of the variation of $\square$               |

Symbols used for the tower design optimization problem

|                                                    |                                                                                                                                 |
|----------------------------------------------------|---------------------------------------------------------------------------------------------------------------------------------|
| $\lambda_{D,j}, j = 1, \dots, n_s$                 | Lagrange multipliers associated <del>to</del> <u>with</u> the fatigue damage constraint                                         |
| $\lambda_f$                                        | Lagrange multipliers associated <del>to</del> <u>with</u> the first frequency constraint                                        |
| $d$                                                | Diameter of the tower elements                                                                                                  |
| <del><math>f_1, f_2, f_1, f_2, f_{IP}</math></del> | First and second natural frequencies of the turbine <del><math>f_{IP}</math>-Rotor,</del> <u>and rotor</u> IP passing frequency |
| $g_{D,j}, j = 1, \dots, n_s$                       | Fatigue damage constraints                                                                                                      |
| $h$                                                | Tower height                                                                                                                    |
| $m$                                                | Mass of the tower                                                                                                               |
| <del><math>n_e, n_e, n_s</math></del>              | Number of tower elements <del><math>n_s</math>-Number-of</del> <u>and</u> fatigue damage constraints                            |
| $r, q$                                             | Gain-schedule parameters for the LQR control gains                                                                              |
| $t$                                                | Thickness of the tower elements                                                                                                 |

Abbreviations

|                            |                                      |
|----------------------------|--------------------------------------|
| AEP                        | Annual energy production             |
| <u>AOE</u>                 | <u>Annual operating expenses</u>     |
| CCD                        | Control co-design                    |
| <del>LCOE</del> <u>CoE</u> | <del>Levelized</del> -Cost of Energy |
| <u>FCR</u>                 | <u>Fixed charge rate</u>             |
| <u>ICC</u>                 | <u>Investment capital cost</u>       |
| LQR                        | Linear quadratic regulator           |

## Appendix B: High-order estimator

In this appendix, we derive the high-order estimator expressed by Eq. (9) and explain the validity assumptions, listed below:

- A1: the objective function and constraints are linear in  $\mathbf{x}$ ;
- A2: there are no couplings between  $\mathbf{x}$  and  $\mathbf{c}$  in the objective function and constraints, i.e.  $\nabla_{\mathbf{x}, \mathbf{c}}^2 f$  and  $\nabla_{\mathbf{x}, \mathbf{c}}^2 g$  are negligible;
- A3: the active set does not change with a small variation  $d\mathbf{c}$ .

455

We consider the following non-linear optimization problem:

$$\begin{aligned} \underset{\mathbf{x}}{\text{minimize}} \quad & z = f(\mathbf{x}, \mathbf{c}_r) \\ \text{subject to} \quad & g_i(\mathbf{x}, \mathbf{c}_r) \leq 0 \quad i = 1, \dots, n. \end{aligned} \quad (\text{B1})$$

The change of optimal objective value due to a change of the control parameter  $d\mathbf{c}$  is defined as:

$$460 \quad dz^*(d\mathbf{c}) = f(\mathbf{x}^* + d\mathbf{x}^*, \mathbf{c}_r + d\mathbf{c}) - f(\mathbf{x}^*, \mathbf{c}_r). \quad (\text{B2})$$

We assume that the objective function  $f$  is linear in  $\mathbf{x}$  ~~and that does not admit (A1) and does not have~~ a coupling between the variables  $\mathbf{x}$  and  $\mathbf{c}$  (A2). Using these assumptions on a second-order Taylor expansion of Eq. (B2) gives:

$$\begin{aligned} dz^*(d\mathbf{c}) = f(\mathbf{x}^* + d\mathbf{x}^*, \mathbf{c}_r + d\mathbf{c}) - f(\mathbf{x}^*, \mathbf{c}_r) = & \nabla_{\mathbf{x}} f(\mathbf{x}^*, \mathbf{c}_r)^T d\mathbf{x}^* + \nabla_{\mathbf{c}} f(\mathbf{x}^*, \mathbf{c}_r)^T d\mathbf{c} + \frac{1}{2} d\mathbf{x}^{*T} \nabla_{\mathbf{x}}^2 f(\mathbf{x}^*, \mathbf{c}_r) d\mathbf{x}^* \\ & + \frac{1}{2} d\mathbf{c}^T \nabla_{\mathbf{c}}^2 f(\mathbf{x}^*, \mathbf{c}_r) d\mathbf{c} + \cancel{d\mathbf{x}^{*T} \nabla_{\mathbf{x}, \mathbf{c}}^2 f(\mathbf{x}^*, \mathbf{c}_r) d\mathbf{c}} + o(\|d\mathbf{c}\|^2). \end{aligned} \quad (\text{B3})$$

We use the notation  $\nabla_{\mathbf{x}}^2 \square$  for the Hessian of a function with respect to  $\mathbf{x}$ . Due to the ~~assumption~~ assumptions A1 and A2 on  $f$ , the second-order terms dependent on  $d\mathbf{x}^*$  are negligible. The remaining terms dependent on  $d\mathbf{c}$  can be identified with the second-order Taylor expansion of the function  $\mathbf{c} \mapsto f(\mathbf{x}^*, \mathbf{c})$  around the point  $\mathbf{c} = \mathbf{c}_r$ . Therefore, the expression can be rewritten as:

465

$$dz^*(d\mathbf{c}) = \nabla_{\mathbf{x}} f(\mathbf{x}^*, \mathbf{c}_r)^T d\mathbf{x}^* + \Delta f(d\mathbf{c}) + o(\|d\mathbf{c}\|^2), \quad (\text{B4})$$

470

where  $\Delta f(d\mathbf{c}) = f(\mathbf{x}^*, \mathbf{c}_r + d\mathbf{c}) - f(\mathbf{x}^*, \mathbf{c}_r)$ . ~~Applying the same assumption~~ Assumptions A1 and A2 on the constraints ~~gives~~ lead to the following expression:

$$g_i(\mathbf{x}^* + d\mathbf{x}^*, \mathbf{c}_r + d\mathbf{c}) - g_i(\mathbf{x}^*, \mathbf{c}_r) = \nabla_{\mathbf{x}} g_i(\mathbf{x}^*, \mathbf{c}_r)^T d\mathbf{x}^* + \Delta g_i(d\mathbf{c}) + o(\|d\mathbf{c}\|^2), \quad i = 1, \dots, n, \quad (\text{B5})$$

where  $\Delta g_i(d\mathbf{c}) = g_i(\mathbf{x}^*, \mathbf{c}_r + d\mathbf{c}) - g_i(\mathbf{x}^*, \mathbf{c}_r)$ ,  $i = 1, \dots, n$ . We consider the set  $\mathcal{I}$  of active constraints ~~that depends on  $\mathbf{c}$~~ . Assuming that the active set does not change with  $d\mathbf{c}$  (A3), one has  $g_i(\mathbf{x}^* + d\mathbf{x}^*, \mathbf{c}_r + d\mathbf{c}) = g_i(\mathbf{x}^*, \mathbf{c}_r) = 0$ ,  $i \in \mathcal{I}$ , and therefore:

$$475 \quad \nabla_{\mathbf{x}} g_i(\mathbf{x}^*, \mathbf{c}_r)^T d\mathbf{x}^* = -\Delta g_i(d\mathbf{c}) + o(\|d\mathbf{c}\|^2), \quad i \in \mathcal{I}. \quad (\text{B6})$$

We can relate the gradient of the objective function to the gradient of the constraints using the optimality conditions. We assume that  $f$  and  $g_i$ ,  $i = 1, \dots, n$  are differentiable and that strong duality holds for Problem B1. Then, if  $\mathbf{x}^*$  is optimal, there is a set of Lagrange multipliers  $\boldsymbol{\lambda}^*$  satisfying the Karush-Kuhn-Tucker conditions (Boyd and Vandenberghe, 2004). Among these, the stationarity condition states:

$$480 \quad \nabla_x f(\mathbf{x}^*, \mathbf{c}_r) + (\boldsymbol{\lambda}^*)^T \nabla_x \mathbf{g}(\mathbf{x}^*, \mathbf{c}_r) = \mathbf{0}. \quad (\text{B7})$$

The stationarity condition is reformulated by post-multiplying it by  $d\mathbf{x}^*$  and by separating ~~constraints in and outside set  $\mathcal{I}$ :~~ active and inactive constraints:

$$\nabla_x f(\mathbf{x}^*, \mathbf{c}_r)^T d\mathbf{x}^* = - \sum_{i \in \mathcal{I}} \lambda_i^* \nabla_x g_i(\mathbf{x}^*, \mathbf{c}_r)^T d\mathbf{x}^* - \sum_{i \notin \mathcal{I}} \lambda_i^* \nabla_x g_i(\mathbf{x}^*, \mathbf{c}_r)^T d\mathbf{x}^*. \quad (\text{B8})$$

The terms corresponding to ~~constraints in set  $\mathcal{I}$  inactive constraints are null since  $\lambda_i = 0$ .~~ The terms corresponding to active   
 485 constraints can be reformulated using Eq. (B6). ~~In addition, we assume that the constraints that do not depend on  $\mathbf{x}$  contribute marginally to the change of optimum. This means that either the corresponding Lagrange multiplier is small, or that the change of design  $d\mathbf{x}^*$  does not impact the constraint, i.e.  $d\mathbf{x}^*$  is orthogonal to the support to the constraint and  $\nabla_x g_i(\mathbf{x}^*)^T d\mathbf{x}^* \ll 1$ .~~   
 Following these considerations, Eq. (B8) becomes:

$$\nabla_x f(\mathbf{x}^*, \mathbf{c}_r)^T d\mathbf{x}^* = \sum_{i \in \mathcal{I}} \lambda_i^* \Delta g_i(d\mathbf{c}) + o(\|d\mathbf{c}\|^2). \quad (\text{B9})$$

490 The expression for  $\nabla_x f(\mathbf{x}^*, \mathbf{c}_r)^T d\mathbf{x}^*$  in Eq. (B4) can be replaced by Eq. (B9), which gives the equation for the high-order estimator:

$$dz^*(d\mathbf{c}) = \sum_{i \in \mathcal{I}} \lambda_i^* \Delta g_i(d\mathbf{c}) + \Delta f(d\mathbf{c}) + o(\|d\mathbf{c}\|^2). \quad (\text{B10})$$

The first term of the formula can be expanded to all constraints instead of the set  $\mathcal{I}$  since  $\lambda_i^* = 0$  for inactive constraints. Furthermore, the high-order estimator formula is derived here using a second-order Taylor expansion. However, we can re-   
 495 peat the reasoning with an arbitrary high order  $k$  of the Taylor expansion, resulting in an expression in  $o(\|d\mathbf{c}\|^k)$  instead of  $o(\|d\mathbf{c}\|^2)$ .

### Appendix C: Application to a quadratic program

In this section, we illustrate how the assumptions associated to the high-order estimator impacts its validity. For this purpose, we study the simple quadratic program below, with  $\mathbf{x} = [x_1, x_2]^T$ :

$$\begin{aligned}
& \underset{\mathbf{x}}{\text{minimize}} && z = \mathbf{y}^T \mathbf{P} \mathbf{y} + \mathbf{q}^T \mathbf{y} + z_0 \quad \text{where } \mathbf{y} = [\mathbf{x}, c]^T \\
& \text{subject to} && \mathbf{G} \mathbf{x} \leq g_2 c^2 + g_1 c + g_0 \\
500 &&& \mathbf{H} \mathbf{x} \leq h_0
\end{aligned} \tag{C1}$$

The value of  $\mathbf{P}$ ,  $\mathbf{q}$ ,  $\mathbf{G}$ ,  $g_i$ ,  $i = 0, \dots, 2$ ,  $\mathbf{H}$  and  $h_0$  can be adjusted to create problems that satisfy or violate the validity assumption for the estimator. The parameter  $z_0$  is set so that the optimal objective value of the reference problem is  $z^* = 0$ . For each type of problem, we study how the optimum and the estimator  $dz_{\text{est}}^*$  change with the value of  $dc$ . The reference problem is always taken for  $c = 0$ , and  $dc$  varies between 0 and 1.

### 505 C1 ~~The objective function is linear in $\mathbf{x}$~~

#### A1: The objective function is linear in $\mathbf{x}$

In order to represent problems with objective functions linear or non-linear in  $\mathbf{x}$ , the diagonal terms of the matrix  $\mathbf{P}$  are varied with a parameter  $b$ . We use the following:

$$\mathbf{P} = \begin{bmatrix} b & 0 & 0 \\ 0 & b & 0 \\ 0 & 0 & 0 \end{bmatrix}, \quad \mathbf{q} = \begin{bmatrix} -10 \\ 1 \\ 0 \end{bmatrix}, \quad \mathbf{G} = \begin{bmatrix} 1 & 0 \end{bmatrix}, \quad g_2 = -4, \quad g_1 = 3, \quad g_0 = 1, \quad \mathbf{H} = \mathbf{0}, \quad h_0 = 0. \tag{C2}$$

510 When  $b = 0$ , the objective function is strictly linear in  $\mathbf{x}$ . With increasing values of  $b$ , the non-linear terms in the objective function dominate more and more the linear term. We study how the estimator performs for  $b = 20, 5$  and  $0.1$ . For this problem, the objective function is not dependent on  $c$ .

Figure C1 shows the value of the objective as a function of  $x_1$  and  $x_2$ . The constraint  $\mathbf{G} \mathbf{x} \leq g_2 c^2 + g_1 c + g_0$  is represented for different values of  $c$  as a yellow line and the optimum is marked as an asterisk. The figure shows that the optimal design changes  
515 in a similar way for the different values of  $b$ . Figure C2 reports the value of the optimum change  $dz^*$  and of the first-order and high-order-estimator  $dz_{\text{est}}^*$  for the different values of  $b$ . For low values of  $b$  when the objective function is mostly linear in  $\mathbf{x}$ , the high-order estimator follows more closely the optimal value. In addition, we observe that the first-order estimator follows the slope of the optimal value at  $c = 0$ . This indicates which problems see the most change in optimal value when  $c$  is varied.

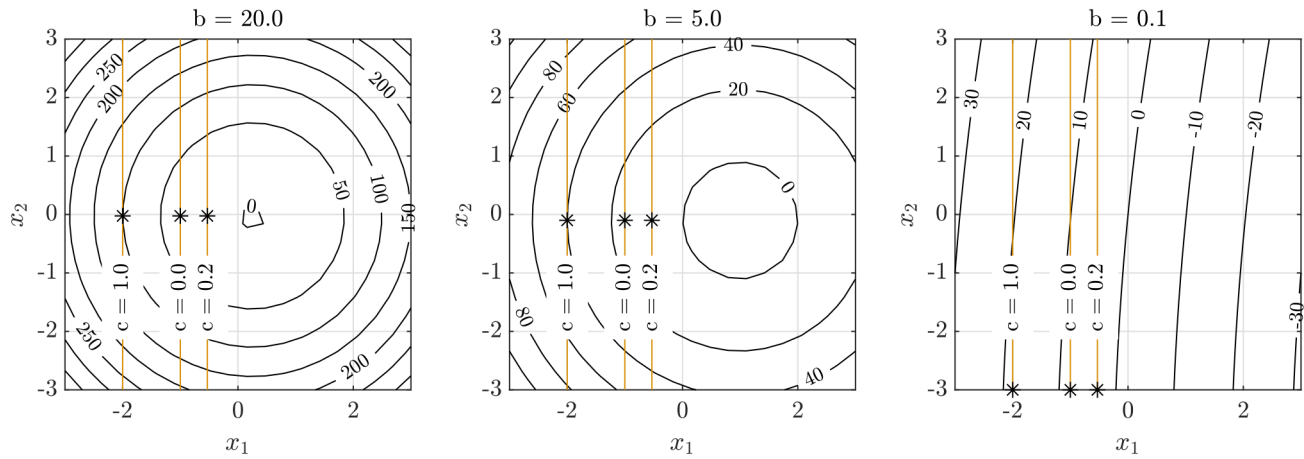

**Figure C1.** Contour plot of the objective function with the optimal value marked with an asterisk (\*), for objective functions with varying degree of non-linearity in  $\boldsymbol{x}$ . The higher the value of  $b$ , the more dominant the non-linear terms compared to the linear terms in the objective function. The constraint is represented as a yellow line and varies with  $c$ .

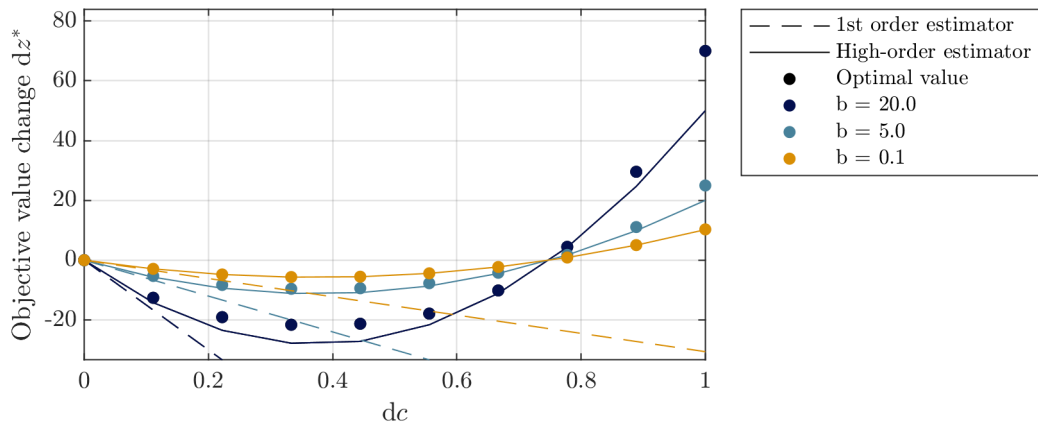

**Figure C2.** Comparison of the optimal objective value with the first-order estimator and the high-order estimator for objective functions with varying degree of non-linearity in  $\boldsymbol{x}$ . The higher the value of  $b$ , the more dominant the non-linear terms compared to the linear terms in the objective function.

**C1 There is no coupling between  $x$  and  $c$  in the objective function**

520 **A2: There is no coupling between  $x$  and  $c$  in the objective function**

In order to represent the coupling between  $x$  and  $c$  in the objective function, the non-diagonal terms of the matrix  $\mathbf{P}$  corresponding to  $x_2$  and  $c$  are set to  $-b$ . We use the following:

$$\mathbf{P} = \begin{bmatrix} 0.1 & 0 & 0 \\ 0 & 0.1 & -b \\ 0 & -b & 0 \end{bmatrix}, \mathbf{q} = \begin{bmatrix} -10 \\ 0 \\ 0 \end{bmatrix}, \mathbf{G} = \begin{bmatrix} 1 & 0 \end{bmatrix}, g_2 = -5, g_1 = 6, g_0 = 1, \mathbf{H} = \mathbf{0}, h_0 = 0. \quad (\text{C3})$$

The problem is solved for  $b = 10.0, 5.0$  and  $0.1$ . The higher  $b$ , the stronger the coupling between  $x_2$  and  $c$ . Figure C3 shows the objective value as a function of  $x_1$  and  $x_2$  as well as the constraint value for  $c = 0.1$  and for  $c = 0.2$ . The higher the coupling, the larger the changes in the objective function. Figure C4 shows that the estimator performs well only in the case of  $b = 0.1$ , where the coupling terms are small. Note that in this case, the first-order and high-order estimators do not change with parameter  $b$ , since they assume that the coupling term is negligible, i.e.  $b = 0$ .

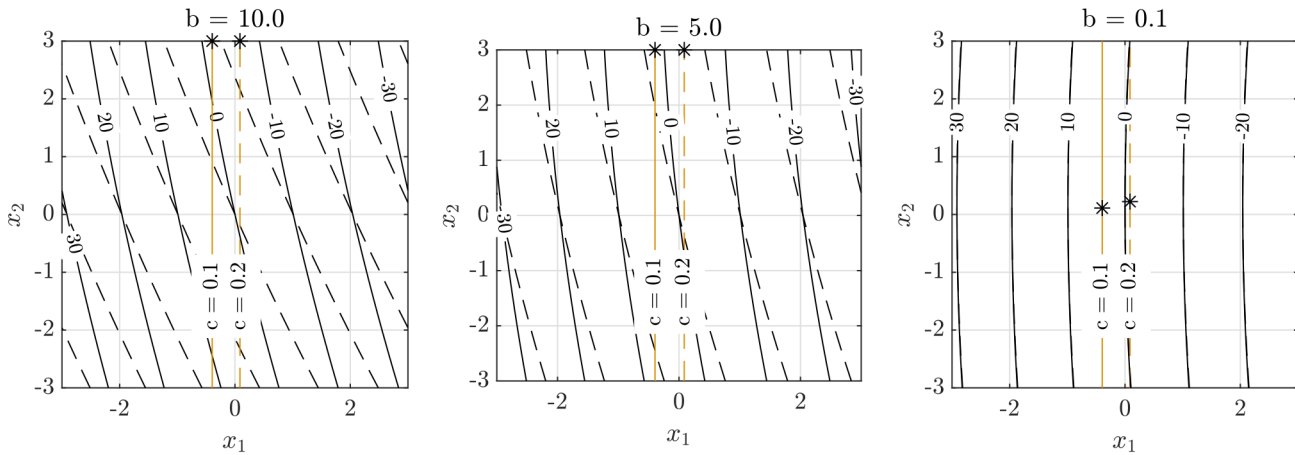

**Figure C3.** Contour plot of the objective function with the optimal value marked with an asterisk (\*), for problems with varying degree of coupling between  $x$  and  $c$  in the objective function. The higher  $b$ , the more dominant the coupling terms compared to the linear terms in the objective function. Results are represented with a solid line for  $c = 0.1$ , and with a dashed line for  $c = 0.2$  in order to highlight the magnitude of the coupling between  $x$  and  $c$ .

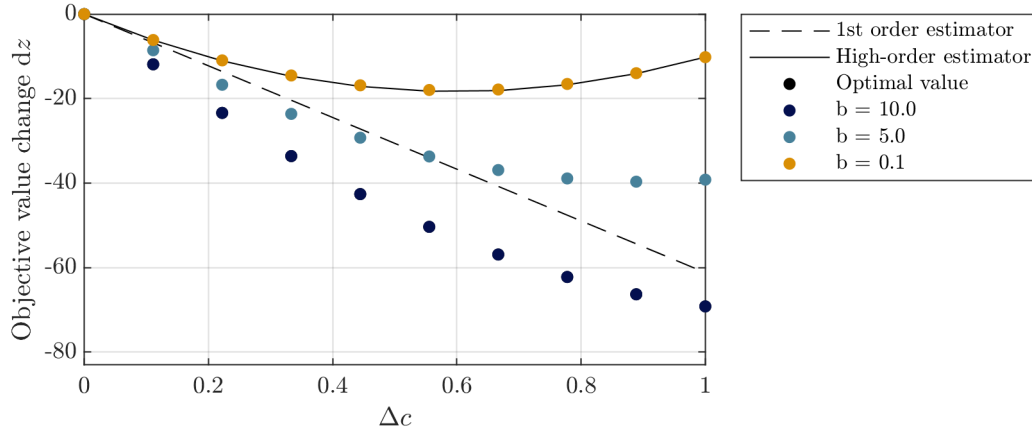

**Figure C4.** Comparison of the optimal objective value with the first-order estimator and the high-order estimator, for problems with varying degree of coupling between  $\mathbf{x}$  and  $c$  in the objective function. The higher  $b$ , the more dominant the coupling terms compared to the linear terms in the objective function. The high-order estimator assumes  $b = 0$ .

### C1 The active set does not change with changes in $c$

#### 530 A3: The active set does not change with changes in $c$

To study how a change in the active set impacts the validity of the estimator, a constraint is added so that it is not active for  $c = 0$  and becomes active as  $c$  increases. We use the following:

$$\mathbf{P} = \begin{bmatrix} 0.1 & 0 & 0 \\ 0 & 0.1 & 0 \\ 0 & 0 & 0 \end{bmatrix}, \mathbf{q} = \begin{bmatrix} -5 \\ 5 \\ 0 \end{bmatrix}, \mathbf{G} = \begin{bmatrix} 1 & 0 \end{bmatrix}, g_2 = -5, g_1 = 6, g_0 = 1, \mathbf{H} = [1, 0], h_0 = 0. \quad (\text{C4})$$

Figure C5 a reports the objective function with the constraint  $\mathbf{G}\mathbf{x} \leq g_2c^2 + g_1c + g_0$  in yellow and the constraint  $\mathbf{H}\mathbf{x} \leq h_0$  in blue. For  $c = 0$  and  $c = 0.1$ , the yellow constraint is active. However, for  $c = 0.7$ , the yellow constraint is no longer active and the blue constraint becomes active. Therefore, the optimum is set where the blue constraint is, and not where the yellow constraint is. ~~In the region where the~~ When the active set changes ( $c > 0.2$ ), the high-order estimator does not follow the optimal value anymore.

### C1 The constraints non-dependent on $c$ have a small impact on the optimum

540 ~~In this case study, the constraint non-dependent on  $c$  are modeled as  $x_1 - bx_2 \leq 0$ . We use the following:-~~

$$\mathbf{P} = \begin{bmatrix} 0.1 & 0 & 0 \\ 0 & 0.1 & 0 \\ 0 & 0 & 0 \end{bmatrix}, \mathbf{q} = \begin{bmatrix} -10 \\ 1 \\ 0 \end{bmatrix}, \mathbf{G} = \begin{bmatrix} 1 & 0 \end{bmatrix}, g_2 = -5, g_1 = 6, g_0 = 1, \mathbf{H} = [1, -b] \underline{h_0 = 0}$$



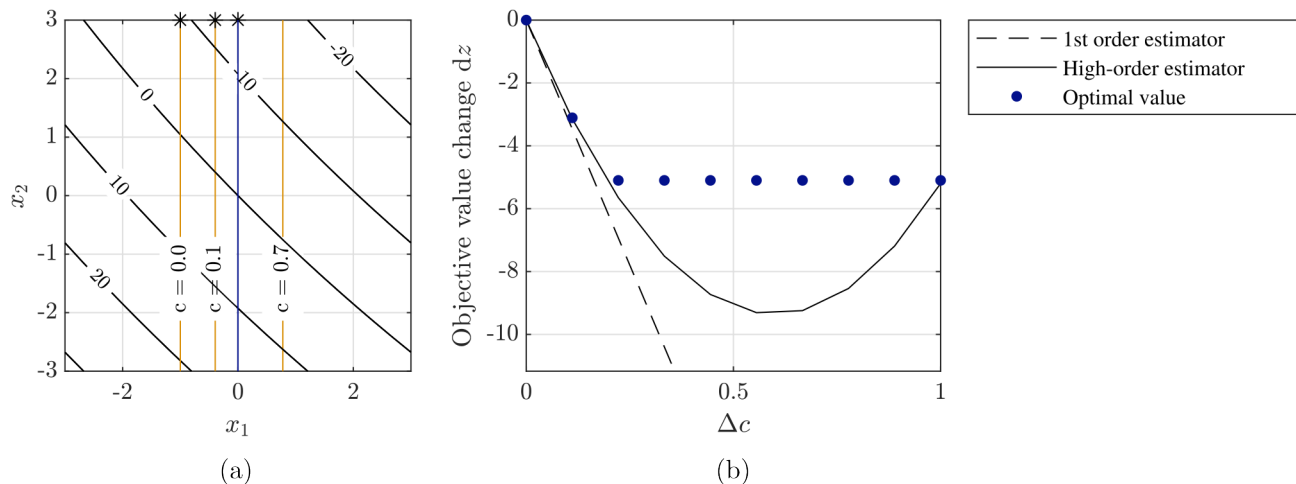

**Figure C5.** Contour plot of the objective function with the optimal value marked with an asterisk (\*), where the blue line represent the constraint non-dependent on  $c$  (a). Comparison between the first-order, the high-order estimator and the optimal objective value for variations in  $c$  (b).

Figure ?? reports the objective value and constraints for  $b = 0.3, 1.0$  and  $100$ . For  $b = 100$ , the constraint  $x_1 - bx_2 \leq 0$  in blue interacts weakly with the yellow constraint that depends on  $c$ . This represents a case where the constraint have a small impact on the objective value. For lower values of  $b$ , we observe that the optimum moves in a different direction than the change in the yellow constraint. This indicates that the yellow and blue constraints are coupled more strongly, and the change in optimum cannot be attributed mainly to the alleviation of the yellow constraint. Figure ?? shows how the optimal objective value changes in comparison to the estimator. For cases where the two constraints interact weakly ( $b = 100$ ), the estimator follows closely the change in optimal objective value.

545

Contour plot of the objective function with the optimal value marked with an asterisk (\*) for problems where the constraint non-dependent on  $c$  (in blue) interacts to a varying degree with the constraint dependent on  $c$  (in yellow). The higher the value of  $b$ , the weaker the interaction with the two types of constraints.

550

Comparison of the optimal objective value with the first-order estimator and the high-order estimator for problems where the constraint non-dependent on  $c$  interacts to a varying degree with the constraint dependent on  $c$ . The higher the value of  $b$ , the weaker the interaction with the two types of constraints.

555 *Author contributions.* JI developed the proposed method and implemented the numerical experiments in Cp-max. CLB supervised the research. JI wrote the paper, with inputs from CLB and MKM. All authors provided important input to this research work through discussions, feedback and by writing the paper.

*Competing interests.* CLB is a member of the editorial board of Wind Energy Science. The authors have no other competing interests to declare.

560 *Acknowledgements.* This work was funded by the Technical University of Denmark through the PhD project "Multi-disciplinary Design Optimization of Wind Turbines with Smart Blade Technology". ~~It was conducted during an external research stay at the Chair of Wind Energy, in co-supervision with the Wind Energy Institute~~ of the Technical University of Munich. The authors would like to acknowledge H. Doruk Aktan and Helena Canet at the Technical University of Munich for their valuable help with  $C_p$ -max. In addition, the authors would like to thank Mathias Stolpe for his valuable ~~feedback during this input, as well as Erik Quaeghebeur and one anonymous referee for~~ reviewing this work and providing feedback on the work.

565

## References

- Allison, J. T. and Herber, D. R.: Special Section on Multidisciplinary Design Optimization: Multidisciplinary Design Optimization of Dynamic Engineering Systems, *AIAA Journal*, 52, 691–710, <https://doi.org/10.2514/1.J052182>, 2014.
- Bortolotti, P., Canet Tarrés, H., Dykes, K., Merz, K., Sethuraman, L., Verelst, D., and Zahle, F.: IEA Wind TCP Task 37: Systems Engineering in Wind Energy - WP2.1 Reference Wind Turbines, <https://doi.org/10.2172/1529216>, 2019.
- Bossanyi, E. A.: The Design of closed loop controllers for wind turbines for wind turbines, *Wind Energy*, 163, 149–163, <https://doi.org/10.1002/we.34>, 2000.
- Bottasso, C. L., Campagnolo, F., and Croce, A.: Multi-disciplinary constrained optimization of wind turbines, *Multibody Syst Dyn*, 27, 21–53, <https://doi.org/10.1007/s11044-011-9271-x>, 2012a.
- 575 Bottasso, C. L., Croce, A., Nam, Y., and Riboldi, C. E. D.: Power curve tracking in the presence of a tip speed constraint, *Renew Energ*, 40, 1–12, <https://doi.org/10.1016/j.renene.2011.07.045>, 2012b.
- Bottasso, C. L., Campagnolo, F., Croce, A., Dilli, S., Gualdoni, F., and Nielsen, M. B.: Structural optimization of wind turbine rotor blades by multilevel sectional/multibody/3D-FEM analysis, *Multibody Syst Dyn*, 32, 87–116, <https://doi.org/10.1007/s11044-013-9394-3>, 2014.
- Bottasso, C. L., Bortolotti, P., Croce, A., and Gualdoni, F.: Integrated aero-structural optimization of wind turbines, *Multibody Syst Dyn*, 38, 580 317–344, <https://doi.org/10.1007/s11044-015-9488-1>, 2016.
- Boyd, S. and Vandenberghe, L.: *Convex Optimization*, Cambridge University Press, <https://doi.org/10.1017/CBO9780511804441>, 2004.
- Camblong, H., Nourdine, S., Vechiu, I., and Tapia, G.: Control of wind turbines for fatigue loads reduction and contribution to the grid primary frequency regulation, *Energy*, 48, 284–291, <https://doi.org/10.1016/j.energy.2012.05.035>, 2012.
- Canet, H., Loew, S., and Bottasso, C. L.: What are the benefits of lidar-assisted control in the design of a wind turbine?, *Wind Energy Science*, 585 6, <https://doi.org/10.5194/wes-6-1325-2021>, 2021.
- Castillo, E., Mínguez, R., and Castillo, C.: Sensitivity analysis in optimization and reliability problems, *Reliab Eng Syst Safe*, 93, 1788–1800, <https://doi.org/10.1016/j.ress.2008.03.010>, 2008.
- Chen, Z. J., Stol, K. A., and Mace, B. R.: Wind turbine blade optimisation with individual pitch and trailing edge flap control, *Renew Energ*, 103, 750–765, <https://doi.org/10.1016/j.renene.2016.11.009>, 2017.
- 590 Deshmukh, A. and Allison, J.: Multidisciplinary dynamic optimization of horizontal axis wind turbine design, *Struct. Multidiscip. O.*, 53, 15–27, <https://doi.org/10.1007/s00158-015-1308-y>, 2016.
- Dykes, K., Damiani, R., Roberts, O., and Lantz, E.: Analysis of ideal towers for tall wind applications, in: *Wind Energy Symposium 2018*, Kissimmee, Florida, USA, 8-12 January 2018, pp. 358–365, American Institute of Aeronautics and Astronautics Inc, AIAA, <https://doi.org/10.2514/6.2018-0999>, 2018.
- 595 Fingersh, L., Hand, M., and Laxson, A.: *Wind Turbine Design Cost and Scaling Model*, <https://doi.org/10.2172/897434>, 2006.
- Garcia-Sanz, M.: Control Co-Design: An engineering game changer, *Advanced Control for Applications: Engineering and Industrial Systems*, 1, e18, <https://doi.org/10.1002/adc2.18>, 2019.
- Hendricks, E., Jannerup, O., and Sørensen, P. H.: *Linear systems control: Deterministic and stochastic methods*, Springer Berlin Heidelberg, Berlin, Heidelberg, <https://doi.org/10.1007/978-3-540-78486-9>, 2008.
- 600 International Electrotechnical Commission: International Standard, IEC 61400-1, *Wind Turbines - Part 1: Design Requirements*, [www.iec.ch/searchpub](http://www.iec.ch/searchpub), 2005.

- Johnson, S. J., Larwood, S., McNerney, G., and Van Dam, C. P.: Balancing fatigue damage and turbine performance through innovative pitch control algorithm, *Wind Energy*, 15, 665–677, <https://doi.org/10.1002/we.495>, 2012.
- Jonkman, B. J.: *Turbsim User’s Guide: Version 1.50*, <https://doi.org/10.2172/965520>, 2009.
- 605 Kim, K., Kim, H. G., and Paek, I.: Application and Validation of Peak Shaving to Improve Performance of a 100 kW Wind Turbine, *Int J Pr Eng Man-GT*, 7, 411–421, <https://doi.org/10.1007/s40684-019-00168-4>, 2020.
- McWilliam, M., Dicholkar, A., Zahle, F., and Kim, T.: Post-Optimum Sensitivity Analysis with Automatically Tuned Numerical Gradients Applied to Swept Wind Turbine Blades, *Energies*, 15, 2998, <https://doi.org/10.3390/en15092998>, 2022.
- Nam, Y., Kien, P. T., and La, Y. H.: Alleviating the tower mechanical load of Multi-MW wind turbines with LQR control, *J Power Electron*, 610 13, 1024–1031, <https://doi.org/10.6113/JPE.2013.13.6.1024>, 2013.
- Pao, L., Zalkind, D., Griffith, D., Chetan, M., Selig, M., Ananda, G., Bay, C., Stehly, T., and Loth, E.: Control co-design of 13 MW downwind two-bladed rotors to achieve 25% reduction in levelized cost of wind energy, *Annual Reviews in Control*, pp. 331–343, <https://doi.org/10.1016/j.arcontrol.2021.02.001>, 2021.
- Sutherland, H. J.: *On the Fatigue Analysis of Wind Turbines*, Tech. rep., Sandia National Laboratories, <https://doi.org/10.2172/9460>, 1999.
- 615 The MathWorks Inc.: *MATLAB version: 9.6.0 (R1019a)*, <https://www.mathworks.com>, 2019.
- Veers, P., Bottasso, C., Manuel, L., Naughton, J., Pao, L., Paquette, J., Robertson, A., Robinson, M., Ananthan, S., Barlas, A., Bianchini, A., Bredmose, H., Horcas, S. G., Keller, J., Madsen, H. A., Manwell, J., Moriarty, P., Nolet, S., and Rinker, J.: Grand Challenges in the Design, Manufacture, and Operation of Future Wind Turbine Systems, *Wind Energy Science Discussions*, 2022, 1–102, <https://doi.org/10.5194/wes-2022-32>, 2022.
- 620 Zahle, F., Tibaldi, C., Pavese, C., McWilliam, M. K., Blasques, J. P., and Hansen, M. H.: Design of an Aeroelastically Tailored 10 MW Wind Turbine Rotor, *Journal of Physics: Conference Series*, 753, <https://doi.org/10.1088/1742-6596/753/6/062008>, 2016.
